# Supplementary material for: Surface and Extracellular Proteome of the Emerging Pathogen Corynebacterium ulcerans
Source: PubMed Central journal article supplement (PMC6027474; doi:10.3390/proteomes6020018), 2018-04-17
Supplement: proteomes-06-00018-s001.pdf [file proteomes-06-00018-s001.pdf]

## Supplementary tables

Supplementary table 1. List of proteins identified as secretome proteins of *C. ulcerans* 809 and BR-AD22. Accession numbers, description and identified peptides per sample.

| Secretome proteins |                                                     | <i>Corynebacterium ulcerans</i> 809 |               |               | <i>Corynebacterium ulcerans</i> BR-AD22 |               |               |
|--------------------|-----------------------------------------------------|-------------------------------------|---------------|---------------|-----------------------------------------|---------------|---------------|
| Accession          | Description                                         | Peptides<br>1                       | Peptides<br>2 | Peptides<br>3 | Peptides<br>1                           | Peptides<br>2 | Peptides<br>3 |
| embl-cds:AEG80554  | Putative Secreted Protein                           | 5                                   | 6             | 4             |                                         |               |               |
| embl-cds:AEG80559  | Peptidyl-Prolyl Cis-Trans Isomerase                 | 2                                   | 5             | 3             |                                         |               |               |
| embl-cds:AEG80585  | Iron-Siderophore Binding Protein                    | 4                                   | 4             | 2             |                                         |               |               |
| embl-cds:AEG80587  | Serine/Threonine Protein Kinase                     | 2                                   | 1             | 3             |                                         |               |               |
| embl-cds:AEG80589  | Penicillin-Binding Protein                          | 7                                   | 6             | 6             |                                         |               |               |
| embl-cds:AEG80629  | Putative Secreted Protein                           | 15                                  | 16            | 15            |                                         |               |               |
| embl-cds:AEG80637  | Putative Secreted Protein                           | 5                                   | 4             | 4             |                                         |               |               |
| embl-cds:AEG80639  | 1,4-Alpha-Glucan-Branching Enzyme                   | 55                                  | 52            | 50            |                                         |               |               |
| embl-cds:AEG80685  | Hypothetical Protein                                | 4                                   | 4             | 5             |                                         |               |               |
| embl-cds:AEG80688  | Arabinosyl Transferase                              | 4                                   | 4             | 4             |                                         |               |               |
| embl-cds:AEG80701  | Putative Secreted Protein                           | 2                                   | 5             | 3             |                                         |               |               |
| embl-cds:AEG80713  | Hypothetical Protein                                | 5                                   | 3             | 4             |                                         |               |               |
| embl-cds:AEG80719  | Putative Secreted Protein                           | 2                                   | 1             | 1             |                                         |               |               |
| embl-cds:AEG80756  | Putative Secreted Lpxtg Protein                     | 11                                  | 5             | 12            |                                         |               |               |
| embl-cds:AEG80757  | Putative Secreted Protein                           | 47                                  | 38            | 45            |                                         |               |               |
| embl-cds:AEG80763  | Putative Secreted Lpxtg Protein                     | 21                                  | 20            | 25            |                                         |               |               |
| embl-cds:AEG80768  | Putative Secreted Protein                           | 8                                   | 9             | 11            |                                         |               |               |
| embl-cds:AEG80769  | Laminin Subunit Beta-2                              | 28                                  | 31            | 29            |                                         |               |               |
| embl-cds:AEG80781  | Putative Secreted Protein                           | 12                                  | 15            | 14            |                                         |               |               |
| embl-cds:AEG80785  | Putative Secreted Protein                           | 15                                  | 11            | 17            |                                         |               |               |
| embl-cds:AEG80821  | Putative Secreted Protein                           | 19                                  | 20            | 23            |                                         |               |               |
| embl-cds:AEG80850  | Putative Secreted Protein                           | 5                                   | 5             | 5             |                                         |               |               |
| embl-cds:AEG80871  | Zinc Abc Transport System Substrate-Binding Protein | 2                                   | 3             | 1             |                                         |               |               |
| embl-cds:AEG80904  | Putative Secreted Protein                           | 11                                  | 13            | 19            |                                         |               |               |
| embl-cds:AEG80907  | Dna-Directed Rna Polymerase Beta' Subunit           | 1                                   | 3             | 4             |                                         |               |               |

|                   |                                                          |    |    |    |  |  |  |
|-------------------|----------------------------------------------------------|----|----|----|--|--|--|
| embl-cds:AEG80909 | Putative Secreted Lpxtg Protein                          | 2  | 4  | 5  |  |  |  |
| embl-cds:AEG80955 | Non-Specific Acid Phosphatase                            | 10 | 11 | 9  |  |  |  |
| embl-cds:AEG80962 | Putative Secreted Protein                                | 3  | 3  | 3  |  |  |  |
| embl-cds:AEG80972 | Adenylate Kinase                                         | 2  | 2  | 2  |  |  |  |
| embl-cds:AEG80974 | Sialidase Precursor                                      | 8  | 8  | 5  |  |  |  |
| embl-cds:AEG80975 | Putative Secreted Protein                                | 5  | 5  | 5  |  |  |  |
| embl-cds:AEG81006 | Molecular Chaperone                                      | 1  | 1  | 3  |  |  |  |
| embl-cds:AEG81023 | Putative Secreted Protein                                | 2  | 2  | 4  |  |  |  |
| embl-cds:AEG81024 | Hypothetical Protein                                     | 3  | 3  | 2  |  |  |  |
| embl-cds:AEG81027 | Manganese Abc Transporter, Substrate-Binding Protein     | 4  | 3  | 2  |  |  |  |
| embl-cds:AEG81038 | Cell-Surface Hemin Receptor                              | 14 | 13 | 12 |  |  |  |
| embl-cds:AEG81039 | Iron Abc Transport System Substrate-Binding Protein      | 2  | 5  | 4  |  |  |  |
| embl-cds:AEG81044 | Isocitrate Dehydrogenase                                 | 3  | 4  | 3  |  |  |  |
| embl-cds:AEG81049 | Venom Serine Protease Kn13                               | 3  | 3  | 4  |  |  |  |
| embl-cds:AEG81065 | Acyl-Coa Carboxylase Alpha Subunit                       | 2  | 2  | 4  |  |  |  |
| embl-cds:AEG81067 | Hypothetical Protein                                     | 2  | 2  | 2  |  |  |  |
| embl-cds:AEG81091 | Putative Secreted Protein                                | 13 | 9  | 10 |  |  |  |
| embl-cds:AEG81107 | Putative Secreted Protein                                | 4  | 4  | 4  |  |  |  |
| embl-cds:AEG81125 | Putative Secreted Protein                                | 2  | 4  | 4  |  |  |  |
| embl-cds:AEG81141 | Putative Membrane Protein                                | 12 | 10 | 8  |  |  |  |
| embl-cds:AEG81154 | Putative Secreted Protein                                | 9  | 8  | 9  |  |  |  |
| embl-cds:AEG81165 | Ferric Anguibactin-Binding Protein                       | 8  | 4  | 8  |  |  |  |
| embl-cds:AEG81202 | Abc Transporter Solute-Binding Protein                   | 2  | 1  | 3  |  |  |  |
| embl-cds:AEG81227 | Glutamate Abc Transport System Substrate-Binding Protein | 7  | 8  | 7  |  |  |  |
| embl-cds:AEG81241 | Trypsin-Like Serine Protease                             | 3  | 3  | 5  |  |  |  |
| embl-cds:AEG81259 | Resuscitation-Promoting Factor                           | 12 | 9  | 14 |  |  |  |
| embl-cds:AEG81313 | Putative Secreted Protein                                | 1  | 1  | 2  |  |  |  |
| embl-cds:AEG81319 | Putative Secreted Protein                                | 1  | 1  | 2  |  |  |  |
| embl-cds:AEG81338 | Putative Secreted Protein                                | 21 | 21 | 19 |  |  |  |

|                   |                                                     |    |    |    |  |  |  |
|-------------------|-----------------------------------------------------|----|----|----|--|--|--|
| embl-cds:AEG81348 | Putative Secreted Protein                           | 9  | 9  | 9  |  |  |  |
| embl-cds:AEG81350 | Hypothetical Protein                                | 1  | 1  | 1  |  |  |  |
| embl-cds:AEG81379 | Putative Secreted Protein                           | 2  | 1  | 1  |  |  |  |
| embl-cds:AEG81408 | Putative Secreted Protein                           | 2  | 1  | 2  |  |  |  |
| embl-cds:AEG81413 | Arginyl-Trna Synthetase                             | 1  | 1  | 2  |  |  |  |
| embl-cds:AEG81460 | Putative Secreted Protein                           | 10 | 15 | 17 |  |  |  |
| embl-cds:AEG81468 | Putative Secreted Protein                           | 5  | 8  | 9  |  |  |  |
| embl-cds:AEG81476 | Putative Membrane-Anchored Protein                  | 2  | 1  | 3  |  |  |  |
| embl-cds:AEG81479 | Putative Secreted Protein                           | 1  | 2  | 1  |  |  |  |
| embl-cds:AEG81518 | Putative Secreted Protein                           | 3  | 3  | 2  |  |  |  |
| embl-cds:AEG81556 | Putative Secreted Protein                           | 5  | 5  | 2  |  |  |  |
| embl-cds:AEG81573 | Iron Abc Transport System Substrate-Binding Protein | 3  | 4  | 4  |  |  |  |
| embl-cds:AEG81587 | Putative Secreted Protein                           | 4  | 4  | 2  |  |  |  |
| embl-cds:AEG81592 | 6-Phosphogluconate Dehydrogenase                    | 3  | 1  | 1  |  |  |  |
| embl-cds:AEG81605 | Putative Secreted Protein                           | 4  | 2  | 4  |  |  |  |
| embl-cds:AEG81635 | Aspartate Ammonia-Lyase                             | 1  | 1  | 2  |  |  |  |
| embl-cds:AEG81645 | Putative Secreted Protein                           | 5  | 3  | 5  |  |  |  |
| embl-cds:AEG81666 | Resuscitation-Promoting Factor Interacting Protein  | 20 | 23 | 20 |  |  |  |
| embl-cds:AEG81667 | Hypothetical Protein                                | 4  | 4  | 5  |  |  |  |
| embl-cds:AEG81668 | Aconitase                                           | 7  | 8  | 6  |  |  |  |
| embl-cds:AEG81674 | Putative Secreted Lpxtg Protein                     | 8  | 6  | 8  |  |  |  |
| embl-cds:AEG81692 | Hypothetical Protein                                | 2  | 2  | 3  |  |  |  |
| embl-cds:AEG81709 | Hypothetical Protein                                | 3  | 6  | 4  |  |  |  |
| embl-cds:AEG81733 | Transketolase                                       | 1  | 2  | 4  |  |  |  |
| embl-cds:AEG81734 | Transaldolase                                       | 4  | 5  | 4  |  |  |  |
| embl-cds:AEG81740 | Triosephosphate Isomerase                           | 3  | 3  | 4  |  |  |  |
| embl-cds:AEG81741 | Phosphoglycerate Kinase                             | 5  | 4  | 2  |  |  |  |
| embl-cds:AEG81742 | Glyceraldehyde 3-Phosphate Dehydrogenase            | 5  | 6  | 4  |  |  |  |
| embl-cds:AEG81794 | Thiol Peroxidase                                    | 2  | 2  | 1  |  |  |  |
| embl-cds:AEG81795 | Peptidyl-Prolyl Cis-Trans Isomerase                 | 2  | 3  | 4  |  |  |  |

|                   |                                                   |    |    |    |  |  |  |
|-------------------|---------------------------------------------------|----|----|----|--|--|--|
| embl-cds:AEG81801 | Protein-Export Membrane Protein                   | 2  | 2  | 4  |  |  |  |
| embl-cds:AEG81819 | Putative Secreted Protein                         | 2  | 2  | 2  |  |  |  |
| embl-cds:AEG81858 | Phosphoenolpyruvate-Protein Phosphotransferase    | 1  | 1  | 1  |  |  |  |
| embl-cds:AEG81927 | Penicillin-Binding Protein                        | 10 | 7  | 10 |  |  |  |
| embl-cds:AEG81975 | Hypothetical Protein                              | 1  | 1  | 1  |  |  |  |
| embl-cds:AEG82025 | Cell Division Protein                             | 2  | 1  | 1  |  |  |  |
| embl-cds:AEG82034 | Penicillin-Binding Protein                        | 2  | 1  | 1  |  |  |  |
| embl-cds:AEG82046 | Serine/Threonine Protein Kinase                   | 8  | 10 | 10 |  |  |  |
| embl-cds:AEG82070 | Dihydrolipoamide Acyltransferase                  | 2  | 1  | 1  |  |  |  |
| embl-cds:AEG82080 | Iron-Siderophore Binding Protein                  | 2  | 1  | 1  |  |  |  |
| embl-cds:AEG82114 | Pyruvate Dehydrogenase E1 Component               | 3  | 2  | 3  |  |  |  |
| embl-cds:AEG82129 | Putative Secreted Lpxtg Protein                   | 1  | 2  | 1  |  |  |  |
| embl-cds:AEG82165 | Putative Secreted Protein                         | 1  | 2  | 4  |  |  |  |
| embl-cds:AEG82175 | Hypothetical Protein                              | 3  | 2  | 2  |  |  |  |
| embl-cds:AEG82202 | Nucleoside Diphosphate Kinase                     | 1  | 1  | 1  |  |  |  |
| embl-cds:AEG82213 | Trigger Factor                                    | 1  | 1  | 1  |  |  |  |
| embl-cds:AEG82238 | Putative Secreted Protein                         | 2  | 1  | 1  |  |  |  |
| embl-cds:AEG82239 | Putative Secreted Protein                         | 18 | 19 | 18 |  |  |  |
| embl-cds:AEG82244 | Hypothetical Protein                              | 2  | 3  | 4  |  |  |  |
| embl-cds:AEG82283 | Protein Piccolo                                   | 14 | 11 | 14 |  |  |  |
| embl-cds:AEG82284 | Hypothetical Protein                              | 1  | 1  | 1  |  |  |  |
| embl-cds:AEG82285 | Putative Secreted Protein                         | 1  | 1  | 1  |  |  |  |
| embl-cds:AEG82299 | Cysteine Synthase                                 | 4  | 3  | 4  |  |  |  |
| embl-cds:AEG82314 | Phosphate Uptake System Phosphate-Binding Protein | 3  | 1  | 1  |  |  |  |
| embl-cds:AEG82337 | Phosphoribosylamine-Glycine Ligase                | 2  | 1  | 2  |  |  |  |
| embl-cds:AEG82344 | Putative Secreted Protein                         | 10 | 11 | 9  |  |  |  |
| embl-cds:AEG82349 | Putative Secreted Lpxtg Protein                   | 24 | 28 | 22 |  |  |  |
| embl-cds:AEG82363 | Putative Secreted Protein                         | 10 | 6  | 12 |  |  |  |
| embl-cds:AEG82375 | Laminin Subunit Alpha-1                           | 1  | 2  | 3  |  |  |  |
| embl-cds:AEG82376 | Trypsin-Like Serine Protease                      | 8  | 6  | 6  |  |  |  |

|                   |                                                 |    |    |    |  |  |  |
|-------------------|-------------------------------------------------|----|----|----|--|--|--|
| embl-cds:AEG82395 | D-Alanyl-D-Alanine Carboxypeptidase             | 6  | 5  | 5  |  |  |  |
| embl-cds:AEG82399 | Putative Secreted Protein                       | 12 | 11 | 11 |  |  |  |
| embl-cds:AEG82410 | Hypothetical Protein                            | 2  | 2  | 3  |  |  |  |
| embl-cds:AEG82411 | Molecular Chaperone                             | 5  | 2  | 2  |  |  |  |
| embl-cds:AEG82415 | Putative Secreted Protein                       | 21 | 26 | 22 |  |  |  |
| embl-cds:AEG82436 | Acetate Kinase                                  | 3  | 2  | 4  |  |  |  |
| embl-cds:AEG82446 | Putative Secreted Protein                       | 3  | 4  | 4  |  |  |  |
| embl-cds:AEG82449 | Hypothetical Protein                            | 1  | 1  | 1  |  |  |  |
| embl-cds:AEG82454 | Putative Secreted Protein                       | 11 | 10 | 10 |  |  |  |
| embl-cds:AEG82460 | Putative Secreted Protein                       | 28 | 26 | 29 |  |  |  |
| embl-cds:AEG82467 | Putative Secreted Protein                       | 49 | 53 | 56 |  |  |  |
| embl-cds:AEG82476 | Surface-Anchored Protein, Fimbrial Subunit      | 9  | 7  | 8  |  |  |  |
| embl-cds:AEG82479 | Surface-Anchored Protein, Fimbrial Subunit      | 7  | 9  | 7  |  |  |  |
| embl-cds:AEG82485 | Putative Secreted Protein                       | 2  | 3  | 4  |  |  |  |
| embl-cds:AEG82493 | Putative Membrane Protein                       | 1  | 1  | 1  |  |  |  |
| embl-cds:AEG82495 | Hypothetical Protein                            | 15 | 20 | 18 |  |  |  |
| embl-cds:AEG82500 | Putative Secreted Protein                       | 4  | 3  | 3  |  |  |  |
| embl-cds:AEG82501 | Corynebacterial Protease Cp40 Precursor         | 4  | 9  | 6  |  |  |  |
| embl-cds:AEG82506 | Surface-Anchored Protein, Fimbrial Subunit      | 39 | 41 | 43 |  |  |  |
| embl-cds:AEG82513 | Hypothetical Protein                            | 7  | 4  | 5  |  |  |  |
| embl-cds:AEG82521 | Abc Transport System, Substrate-Binding Protein | 7  | 8  | 7  |  |  |  |
| embl-cds:AEG82544 | Hypothetical Protein                            | 7  | 7  | 5  |  |  |  |
| embl-cds:AEG82558 | Putative Secreted Protein                       | 7  | 5  | 5  |  |  |  |
| embl-cds:AEG82562 | Acyl-Coa Synthetase                             | 11 | 9  | 9  |  |  |  |
| embl-cds:AEG82563 | Envelope Lipids Regulation Factor               | 2  | 1  | 2  |  |  |  |
| embl-cds:AEG82565 | Trehalose Corynomycyl Transferase               | 45 | 45 | 46 |  |  |  |
| embl-cds:AEG82574 | Glycerophosphoryl Diester Phosphodiesterase     | 12 | 8  | 12 |  |  |  |
| embl-cds:AEG82580 | Putative Secreted Protein                       | 17 | 19 | 18 |  |  |  |
| embl-cds:AEG82593 | Cell-Surface Hemin Receptor                     | 1  | 1  | 2  |  |  |  |
| embl-cds:AEG82616 | Housekeeping Sortase                            | 4  | 3  | 3  |  |  |  |

|                            |                                                                                 |   |   |   |   |   |   |
|----------------------------|---------------------------------------------------------------------------------|---|---|---|---|---|---|
| embl-cds: AEG82641         | Penicillin-Binding Protein                                                      | 8 | 8 | 6 |   |   |   |
| embl-cds: AEG82649         | Cell-Surface Hemin Receptor                                                     | 5 | 2 | 6 |   |   |   |
| embl-cds: AEG82658         | Putative Secreted Protein                                                       | 5 | 3 | 2 |   |   |   |
| embl-cds: AEG82663         | Putative Secreted Lpxtg Protein                                                 | 1 | 1 | 1 |   |   |   |
| embl-cds: AEG82674         | Putative Secreted Protein                                                       | 4 | 4 | 3 |   |   |   |
| embl-cds: AEG82677         | 4-Aminobutyrate Aminotransferase                                                | 1 | 1 | 2 |   |   |   |
| embl-cds: AEG82701         | Putative Secreted Protein                                                       | 1 | 1 | 1 |   |   |   |
| embl-cds: AEG82709         | Putative Secreted Protein                                                       | 1 | 4 | 5 |   |   |   |
| embl-cds: AEG82712         | Thioredoxin Reductase                                                           | 1 | 2 | 1 |   |   |   |
| G0CTC1; embl-cds: AEG81546 | Argininosuccinate Synthase                                                      |   |   |   | 3 | 4 | 6 |
| G0CTC4; embl-cds: AEG81549 | Tyrosine--Trna Ligase                                                           |   |   |   | 3 | 1 | 2 |
| G0CTF8; embl-cds: AEG81583 | Inhibitor Of Odh Activity                                                       |   |   |   | 1 | 4 | 4 |
| G0CTH0; embl-cds: AEG81595 | Uncharacterized Protein                                                         |   |   |   | 1 | 1 | 2 |
| G0CTI2; embl-cds: AEG81607 | Rna Polymerase-Binding Protein Rbpa                                             |   |   |   | 1 | 1 | 2 |
| G0CTJ1; embl-cds: AEG82717 | Chromosome Partitioning Protein                                                 |   |   |   | 1 | 1 | 2 |
| G0CTN4; embl-cds: AEG81649 | Uncharacterized Protein                                                         |   |   |   | 1 | 1 | 3 |
| G0CTQ7; embl-cds: AEG81672 | Upf0210 Protein Culc22_01154                                                    |   |   |   | 1 | 1 | 6 |
| G0CTS2; embl-cds: AEG81687 | Uncharacterized Protein                                                         | 1 | 2 | 2 | 1 |   |   |
| G0CTS8; embl-cds: AEG81693 | Uncharacterized Protein                                                         | 4 | 3 | 3 |   |   | 1 |
| G0CTS9; embl-cds: AEG81694 | Uncharacterized Protein                                                         | 2 | 2 | 2 |   |   | 1 |
| G0CTU2; embl-cds: AEG81708 | Uncharacterized Protein                                                         | 3 | 2 | 3 | 1 |   |   |
| G0CTV7; embl-cds: AEG81724 | Abc-Type Transport System Involved In Fe-S Cluster Assembly Atp-Binding Protein |   |   | 1 | 3 | 5 | 6 |
| G0CTV8; embl-cds: AEG81725 | Abc-Type Transport System Involved In Fe-S Cluster Assembly Permease Component  | 1 | 1 | 1 | 7 | 6 | 7 |

|                                   |                                                                                      |   |   |   |    |    |    |
|-----------------------------------|--------------------------------------------------------------------------------------|---|---|---|----|----|----|
| G0CTV9;<br>embl-<br>cds: AEG81726 | Abc-Type Transport System<br>Involved In Fe-S Cluster<br>Assembly Permease Component |   |   |   | 7  | 7  | 11 |
| G0CTY5;<br>embl-<br>cds: AEG81752 | Ribulose-Phosphate 3-Epimerase                                                       |   |   |   | 1  | 1  | 1  |
| G0CTZ3;<br>embl-<br>cds: AEG81759 | Dna-Directed Rna Polymerase<br>Subunit Omega                                         |   |   |   | 2  | 1  | 2  |
| G0CU06;<br>embl-<br>cds: AEG81772 | Elongation Factor Ef-P                                                               |   | 2 | 2 | 2  | 4  | 4  |
| G0CU14;<br>embl-<br>cds: AEG81780 | Putative Secreted Protein                                                            | 5 | 5 | 6 | 5  | 7  | 10 |
| G0CU23;<br>embl-<br>cds: AEG80551 | Dna Gyrase Subunit A                                                                 |   |   |   | 7  | 5  | 3  |
| G0CU44;<br>embl-<br>cds: AEG81799 | Putative Secreted Protein                                                            | 6 | 1 | 6 | 3  | 6  | 7  |
| G0CU51;<br>embl-<br>cds: AEG81806 | Probable Transcriptional<br>Regulatory Protein<br>Culc22_01288                       |   |   |   | 1  | 3  | 2  |
| G0CU61;<br>embl-<br>cds: AEG81816 | Threonine--Trna Ligase                                                               |   |   | 2 | 3  | 5  | 5  |
| G0CU76;<br>embl-<br>cds: AEG81831 | Deoxyuridine 5'-Triphosphate<br>Nucleotidohydrolase                                  |   |   |   | 2  | 2  | 1  |
| G0CU78;<br>embl-<br>cds: AEG81833 | Uncharacterized Protein                                                              |   |   |   | 1  | 1  | 1  |
| G0CU89;<br>embl-<br>cds: AEG81844 | Dtxr-Family Transcription<br>Regulator                                               | 1 | 1 | 1 | 2  | 6  | 7  |
| G0CU95;<br>embl-<br>cds: AEG81850 | Alkyl Hydroperoxide Reductase                                                        | 2 |   | 3 | 3  | 8  | 7  |
| G0CUC6;<br>embl-<br>cds: AEG80578 | Uncharacterized Protein                                                              | 1 |   |   | 1  | 2  | 4  |
| G0CUG4;<br>embl-<br>cds: AEG80613 | Uncharacterized Protein                                                              |   | 1 | 1 | 1  | 1  | 1  |
| G0CUI8;<br>embl-<br>cds: AEG81863 | Phosphocarrier Protein Hpr                                                           | 2 | 2 | 3 |    |    |    |
| G0CUJ6; embl-<br>cds: AEG81871    | Diaminopimelate Epimerase                                                            |   |   |   | 1  | 3  | 3  |
| G0CUM1;<br>embl-<br>cds: AEG81896 | Polyribonucleotide<br>Nucleotidyltransferase                                         | 4 | 2 | 5 | 13 | 10 | 12 |
| G0CUN1;<br>embl-<br>cds: AEG81906 | Translation Initiation Factor If-2                                                   |   |   |   | 4  | 9  | 7  |
| G0CUN3;<br>embl-<br>cds: AEG81908 | Transcription<br>Termination/Antitermination<br>Protein Nusa                         |   |   |   | 5  | 5  | 4  |

|                                   |                                                                          |    |    |    |   |    |    |
|-----------------------------------|--------------------------------------------------------------------------|----|----|----|---|----|----|
| G0CUP9;<br>embl-<br>cds: AEG81923 | Mycothiol Reductase                                                      |    |    |    | 6 | 6  | 4  |
| G0CUQ4;<br>embl-<br>cds: AEG81928 | 4-Hydroxy-3-Methylbut-2-En-1-<br>Yl Diphosphate Synthase<br>(Flavodoxin) |    |    |    | 3 | 3  | 6  |
| G0CUR3;<br>embl-<br>cds: AEG81937 | Elongation Factor Ts                                                     | 6  | 3  | 6  | 9 | 12 | 17 |
| G0CUR4;<br>embl-<br>cds: AEG81938 | 30S Ribosomal Protein S2                                                 |    |    |    | 3 | 1  | 3  |
| G0CUV7;<br>embl-<br>cds: AEG80677 | Upf0145 Protein Culc22_00134                                             |    |    |    | 3 | 3  | 2  |
| G0CUW8;<br>embl-<br>cds: AEG80687 | Putative Secreted Protein                                                | 3  | 3  | 5  | 6 | 5  | 3  |
| G0CUX1;<br>embl-<br>cds: AEG80690 | Decaprenylphosphoryl-Beta-D-<br>Ribose 2-Epimerase Component             |    |    |    | 3 | 3  | 4  |
| G0CUX8;<br>embl-<br>cds: AEG80697 | Uncharacterized Protein                                                  | 1  | 1  | 1  |   | 1  | 1  |
| G0CV12;<br>embl-<br>cds: AEG81955 | 50S Ribosomal Protein L19                                                |    |    |    | 2 | 2  | 3  |
| G0CV22;<br>embl-<br>cds: AEG81965 | Nitrogen Regulatory Protein P-Ii                                         |    |    |    | 1 | 1  | 1  |
| G0CV41;<br>embl-<br>cds: AEG81983 | Putative Secreted Protein                                                | 4  | 4  | 4  | 4 | 5  | 5  |
| G0CV55;<br>embl-<br>cds: AEG81997 | Histidinol Dehydrogenase                                                 |    |    |    | 1 | 2  | 1  |
| G0CV58;<br>embl-<br>cds: AEG82000 | Putative Secreted Protein                                                | 2  | 2  | 4  | 3 | 2  | 4  |
| G0CV74;<br>embl-<br>cds: AEG82016 | Putative Secreted Protein                                                | 2  | 2  | 2  | 2 | 1  | 2  |
| G0CV86;<br>embl-<br>cds: AEG80721 | Pyridoxal 5'-Phosphate Synthase<br>Subunit Pdxs                          |    |    | 1  | 4 | 5  | 5  |
| G0CV98;<br>embl-<br>cds: AEG80733 | Uncharacterized Protein                                                  |    |    |    | 4 | 6  | 5  |
| G0CVA1;<br>embl-<br>cds: AEG80736 | Nucleoid-Associated Protein<br>Culc22_00193                              | 1  |    | 1  | 2 | 2  | 2  |
| G0CVA8;<br>embl-<br>cds: AEG80743 | Putative Secreted Protein                                                | 11 | 10 | 10 | 6 | 6  | 7  |
| G0CVB1;<br>embl-<br>cds: AEG80746 | Uncharacterized Protein                                                  |    |    |    | 1 | 1  | 2  |
| G0CVC7;<br>embl-<br>cds: AEG80762 | Aspartokinase                                                            |    | 1  |    | 2 | 5  | 7  |



|                                   |                                                             |    |    |    |    |    |    |
|-----------------------------------|-------------------------------------------------------------|----|----|----|----|----|----|
| G0CVC9;<br>embl-<br>cds: AEG80764 | Aspartate-Semialdehyde<br>Dehydrogenase                     |    |    |    | 3  | 2  | 4  |
| G0CVD1;<br>embl-<br>cds: AEG80766 | Catalase                                                    | 1  | 1  | 4  | 10 | 14 | 14 |
| G0CVF7;<br>embl-<br>cds: AEG80788 | Uncharacterized Protein                                     |    |    |    | 3  | 2  | 1  |
| G0CVF9;<br>embl-<br>cds: AEG80790 | Crp-Family Transcription<br>Regulator                       |    |    |    | 2  | 5  | 6  |
| G0CVG4;<br>embl-<br>cds: AEG80795 | Putative Membrane Protein                                   | 2  | 1  | 1  | 1  | 2  | 2  |
| G0CVI6; embl-<br>cds: AEG82045    | Uncharacterized Protein                                     |    |    |    | 1  | 2  | 2  |
| G0CVJ8; embl-<br>cds: AEG82057    | Ubiquinol-Cytochrome C<br>Reductase Cytochrome C<br>Subunit | 2  | 1  | 1  | 2  | 1  | 2  |
| G0CVK1;<br>embl-<br>cds: AEG82060 | Cytochrome C Oxidase Subunit<br>Ii                          | 6  | 5  | 5  | 6  | 5  | 7  |
| G0CVK3;<br>embl-<br>cds: AEG82062 | Uncharacterized Protein                                     |    |    |    | 2  | 1  | 2  |
| G0CVK8;<br>embl-<br>cds: AEG82067 | Branched-Chain-Amino-Acid<br>Aminotransferase               |    | 1  | 1  | 4  | 4  | 6  |
| G0CVM9;<br>embl-<br>cds: AEG82088 | Uncharacterized Protein                                     |    |    |    | 1  | 2  | 2  |
| G0CVR2;<br>embl-<br>cds: AEG80808 | Cold Shock-Like Protein A                                   | 1  | 1  | 2  | 3  | 4  | 4  |
| G0CVS1;<br>embl-<br>cds: AEG80815 | Putative Secreted Protein                                   | 12 | 12 | 11 | 13 | 11 | 11 |
| G0CVT0;<br>embl-<br>cds: AEG80823 | Dihydrolipoyl Dehydrogenase                                 | 1  | 1  |    | 8  | 7  | 10 |
| G0CVT3;<br>embl-<br>cds: AEG80826 | Succinate Dehydrogenase<br>Flavoprotein Subunit             |    |    |    | 2  | 2  | 2  |
| G0CVT4;<br>embl-<br>cds: AEG80827 | Succinate Dehydrogenase Iron-<br>Sulfur Protein             |    |    |    | 1  | 2  | 1  |
| G0CVT9;<br>embl-<br>cds: AEG80832 | Putative Secreted Protein                                   | 4  | 3  | 2  | 5  | 6  | 4  |
| G0CVU1;<br>embl-<br>cds: AEG80834 | Formate Acetyltransferase                                   |    |    |    | 1  | 2  | 1  |
| G0CVU2;<br>embl-<br>cds: AEG80835 | Formate Acetyltransferase                                   |    |    |    | 3  | 4  | 4  |
| G0CVU4;<br>embl-<br>cds: AEG80837 | Uncharacterized Protein                                     | 2  | 2  | 2  | 2  | 3  | 3  |

|                                   |                                                                       |    |    |    |  |    |    |    |
|-----------------------------------|-----------------------------------------------------------------------|----|----|----|--|----|----|----|
| G0CVU8;<br>embl-<br>cds: AEG80841 | 2,3-Bisphosphoglycerate-<br>Dependent Phosphoglycerate<br>Mutase      |    | 1  |    |  | 6  | 7  | 6  |
| G0CVY9;<br>embl-<br>cds: AEG82113 | Uncharacterized Protein                                               |    |    |    |  | 2  | 3  | 2  |
| G0CW00;<br>embl-<br>cds: AEG82124 | Glutamine--Fructose-6-<br>Phosphate Aminotransferase<br>[Isomerizing] | 1  |    | 1  |  | 3  | 9  | 10 |
| G0CW25;<br>embl-<br>cds: AEG82149 | 4-Alpha-Glucanotransferase                                            |    |    |    |  | 3  | 6  | 7  |
| G0CW81;<br>embl-<br>cds: AEG80892 | 50S Ribosomal Protein L11                                             |    |    | 1  |  | 1  | 1  | 1  |
| G0CW86;<br>embl-<br>cds: AEG80897 | 50S Ribosomal Protein L10                                             |    | 1  | 1  |  | 3  | 2  | 4  |
| G0CW87;<br>embl-<br>cds: AEG80898 | 50S Ribosomal Protein L7/L12                                          | 2  | 1  | 1  |  | 5  | 3  | 4  |
| G0CW95;<br>embl-<br>cds: AEG80906 | Dna-Directed Rna Polymerase<br>Subunit Beta                           | 2  |    | 1  |  | 17 | 10 | 11 |
| G0CWB0;<br>embl-<br>cds: AEG80921 | Uncharacterized Protein                                               |    |    |    |  | 1  | 2  | 1  |
| G0CWB2;<br>embl-<br>cds: AEG80923 | 30S Ribosomal Protein S7                                              |    |    |    |  | 4  | 4  | 3  |
| G0CWB3;<br>embl-<br>cds: AEG80924 | Elongation Factor G                                                   | 11 | 13 | 10 |  | 26 | 25 | 27 |
| G0CWB4;<br>embl-<br>cds: AEG80925 | Elongation Factor Tu                                                  | 14 | 11 | 10 |  | 20 | 22 | 23 |
| G0CWC4;<br>embl-<br>cds: AEG80935 | 50S Ribosomal Protein L3                                              | 2  | 3  | 3  |  | 4  | 5  | 5  |
| G0CWC5;<br>embl-<br>cds: AEG80936 | 50S Ribosomal Protein L4                                              | 4  | 2  | 4  |  | 4  | 7  | 9  |
| G0CWC6;<br>embl-<br>cds: AEG80937 | 50S Ribosomal Protein L23                                             | 1  | 2  | 1  |  | 4  | 3  | 4  |
| G0CWC7;<br>embl-<br>cds: AEG80938 | 50S Ribosomal Protein L2                                              | 2  | 5  | 4  |  | 7  | 8  | 10 |
| G0CWC8;<br>embl-<br>cds: AEG80939 | 30S Ribosomal Protein S19                                             |    |    |    |  | 4  | 5  | 4  |
| G0CWC9;<br>embl-<br>cds: AEG80940 | 50S Ribosomal Protein L22                                             | 1  |    |    |  | 3  | 4  | 3  |
| G0CWD0;<br>embl-<br>cds: AEG80941 | 30S Ribosomal Protein S3                                              | 1  |    |    |  | 4  | 7  | 5  |
| G0CWD1;<br>embl-<br>cds: AEG80942 | 50S Ribosomal Protein L16                                             |    |    | 1  |  | 2  | 2  | 3  |

|                                   |                                                   |   |    |   |    |    |    |
|-----------------------------------|---------------------------------------------------|---|----|---|----|----|----|
| G0CWD3;<br>embl-<br>cds: AEG80944 | 30S Ribosomal Protein S17                         |   |    |   | 2  | 1  | 3  |
| G0CWD4;<br>embl-<br>cds: AEG80945 | Putative Secreted Protein                         |   |    | 1 | 13 | 19 | 18 |
| G0CWD9;<br>embl-<br>cds: AEG80950 | 50S Ribosomal Protein L24                         | 1 | 1  | 1 | 2  | 2  | 4  |
| G0CWE0;<br>embl-<br>cds: AEG80951 | 50S Ribosomal Protein L5                          |   |    |   | 3  | 3  | 4  |
| G0CWE5;<br>embl-<br>cds: AEG80956 | 30S Ribosomal Protein S8                          |   |    |   | 1  | 1  | 1  |
| G0CWJ7;<br>embl-<br>cds: AEG82180 | Elongation Factor 4                               |   |    |   | 2  | 4  | 4  |
| G0CWL4;<br>embl-<br>cds: AEG82197 | Gtpase Obg                                        |   |    |   | 1  | 3  | 1  |
| G0CWL5;<br>embl-<br>cds: AEG82198 | 50S Ribosomal Protein L27                         | 1 | 1  |   | 3  | 3  | 1  |
| G0CWL6;<br>embl-<br>cds: AEG82199 | 50S Ribosomal Protein L21                         | 1 |    |   | 2  | 3  | 2  |
| G0CWM4;<br>embl-<br>cds: AEG82207 | Malate Dehydrogenase                              |   |    |   | 2  | 2  | 5  |
| G0CWM5;<br>embl-<br>cds: AEG82208 | Tetr-Family Transcription<br>Regulator            |   |    |   | 3  | 3  | 2  |
| G0CWM9;<br>embl-<br>cds: AEG82211 | Atp-Dependent Clp Protease<br>Proteolytic Subunit | 1 |    |   | 3  | 2  | 3  |
| G0CWN2;<br>embl-<br>cds: AEG80960 | 50S Ribosomal Protein L30                         |   |    | 1 | 1  | 2  | 2  |
| G0CWN3;<br>embl-<br>cds: AEG80961 | 50S Ribosomal Protein L15                         |   | 1  | 2 | 3  | 5  | 4  |
| G0CWN5;<br>embl-<br>cds: AEG80963 | Maltotriose-Binding Protein                       | 9 | 11 | 9 | 11 | 9  | 10 |
| G0CWP4;<br>embl-<br>cds: AEG80973 | Methionine Aminopeptidase                         |   |    |   | 2  | 2  | 1  |
| G0CWP7;<br>embl-<br>cds: AEG80976 | Translation Initiation Factor If-1                | 1 | 1  | 1 | 1  | 2  |    |
| G0CWQ0;<br>embl-<br>cds: AEG80979 | 30S Ribosomal Protein S4                          |   |    |   | 5  | 2  | 4  |
| G0CWQ1;<br>embl-<br>cds: AEG80980 | Dna-Directed Rna Polymerase<br>Subunit Alpha      | 3 | 2  | 3 | 8  | 10 | 12 |
| G0CWR4;<br>embl-<br>cds: AEG80992 | 30S Ribosomal Protein S9                          |   |    |   | 4  | 3  | 4  |

|                                   |                                                         |    |    |    |    |    |    |
|-----------------------------------|---------------------------------------------------------|----|----|----|----|----|----|
| G0CWS7;<br>embl-<br>cds: AEG81005 | 10 Kda Chaperonin                                       |    | 1  | 2  | 2  | 4  | 4  |
| G0CWT5;<br>embl-<br>cds: AEG81012 | Uncharacterized Protein                                 |    |    |    | 2  | 6  | 6  |
| G0CWU3;<br>embl-<br>cds: AEG81019 | Putative Secreted Protein                               | 3  | 4  | 2  | 5  | 2  | 2  |
| G0CWX0;<br>embl-<br>cds: AEG82217 | Ribose 5-Phosphate Isomerase                            |    |    |    | 2  | 3  | 2  |
| G0CWX7;<br>embl-<br>cds: AEG82224 | Uncharacterized Protein                                 |    |    |    | 1  | 1  | 1  |
| G0CX22;<br>embl-<br>cds: AEG82249 | Bacterioferritin Comigratory Protein                    |    |    |    | 1  | 2  | 4  |
| G0CX62;<br>embl-<br>cds: AEG81057 | Uracil Phosphoribosyltransferase                        |    |    |    | 1  | 1  | 2  |
| G0CX66;<br>embl-<br>cds: AEG81061 | Dihydrolipoamide Dehydrogenase                          |    | 1  | 1  | 3  | 5  | 5  |
| G0CX81;<br>embl-<br>cds: AEG81075 | Acyl-Coa Carboxylase Complex Subunit                    |    |    |    | 1  | 5  | 3  |
| G0CX97;<br>embl-<br>cds: AEG81093 | Lytr-Family Transcription Regulator                     | 7  | 2  | 5  | 4  | 6  | 8  |
| G0CX99;<br>embl-<br>cds: AEG81095 | Mannose-1-Phosphate Guanyltransferase                   |    |    |    | 1  | 1  | 5  |
| G0CXB0;<br>embl-<br>cds: AEG81105 | Two-Component System Transcriptional Regulatory Protein |    |    |    | 1  | 2  | 1  |
| G0CXB7;<br>embl-<br>cds: AEG81112 | Uncharacterized Protein                                 |    |    |    | 1  | 3  | 5  |
| G0CXC9;<br>embl-<br>cds: AEG81124 | Putative Secreted Protein                               | 13 | 11 | 11 | 11 | 10 | 11 |
| G0CXD3;<br>embl-<br>cds: AEG82274 | Ribonucleoside-Diphosphate Reductase Subunit Beta       | 1  | 1  |    | 5  | 7  | 5  |
| G0CXD5;<br>embl-<br>cds: AEG82276 | Ribonucleoside-Diphosphate Reductase                    |    |    | 2  | 8  | 10 | 11 |
| G0CXE0;<br>embl-<br>cds: AEG82281 | Uncharacterized Protein                                 |    |    |    | 1  | 4  | 1  |
| G0CXF5;<br>embl-<br>cds: AEG82295 | Udp-N-Acetylglucosamine 1-Carboxyvinyltransferase       |    |    |    | 3  | 2  | 4  |
| G0CXF7;<br>embl-<br>cds: AEG82297 | Luxr-Family Transcription Regulator                     |    |    |    | 1  | 1  | 1  |
| G0CXG7;<br>embl-<br>cds: AEG82307 | Succinyl-Coa:Coenzyme A Transferase                     | 4  | 3  | 7  | 17 | 18 | 20 |

|                                    |                                                                 |    |    |    |    |    |    |
|------------------------------------|-----------------------------------------------------------------|----|----|----|----|----|----|
| G0CXH8;<br>embl-<br>cds: AEG82318  | Upf0678 Fatty Acid-Binding Protein-Like Protein<br>Culc22_01893 |    |    |    | 6  | 3  | 5  |
| G0CXI9; embl-<br>cds: AEG82329     | Phosphoribosylformylglycinamide Synthase Subunit Purq           |    |    |    | 2  | 3  | 2  |
| G0CXJ3; embl-<br>cds: AEG82333     | Phosphoribosylaminoimidazole-Succinocarboxamide Synthase        |    |    |    | 2  | 1  | 2  |
| G0C XK1;<br>embl-<br>cds: AEG82341 | Two-Component System Transcriptional Regulatory Protein         |    |    |    | 2  | 4  | 3  |
| G0C XK8;<br>embl-<br>cds: AEG81127 | Uncharacterized Protein                                         | 1  | 1  | 1  | 3  | 3  | 3  |
| G0C XK9;<br>embl-<br>cds: AEG81128 | Uncharacterized Protein                                         | 2  | 1  | 2  | 2  | 3  | 2  |
| G0C XM1;<br>embl-<br>cds: AEG81140 | Uncharacterized Protein                                         | 1  | 1  |    | 1  | 1  | 1  |
| G0C XN2;<br>embl-<br>cds: AEG81150 | Oxaloacetate Decarboxylase Alpha Subunit                        |    |    |    | 1  | 2  | 3  |
| G0C XP5;<br>embl-<br>cds: AEG81163 | Carbonic Anhydrase                                              | 4  | 4  | 4  | 6  | 6  | 7  |
| G0C XQ6;<br>embl-<br>cds: AEG81174 | Resuscitation-Promoting Factor                                  | 12 | 10 | 13 | 12 | 12 | 12 |
| G0C XQ9;<br>embl-<br>cds: AEG81178 | Putative Secreted Protein                                       | 1  | 3  | 1  | 2  | 1  | 3  |
| G0C XR6;<br>embl-<br>cds: AEG81185 | Citrate Synthase                                                |    | 1  |    | 6  | 8  | 7  |
| G0C XR9;<br>embl-<br>cds: AEG81188 | Superoxide Dismutase [Cu-Zn]                                    | 2  | 2  | 2  | 2  | 3  | 4  |
| G0C Y06;<br>embl-<br>cds: AEG82362 | Putative Secreted Protein                                       | 4  | 4  | 3  | 6  | 3  | 3  |
| G0C Y09;<br>embl-<br>cds: AEG82365 | Putative Secreted Protein                                       | 1  | 1  | 3  | 3  | 6  | 3  |
| G0C Y30;<br>embl-<br>cds: AEG81210 | Uncharacterized Protein                                         |    |    |    | 1  | 1  | 2  |
| G0C Y42;<br>embl-<br>cds: AEG81222 | Uncharacterized Protein                                         | 5  | 4  | 4  | 6  | 5  | 6  |
| G0C Y56;<br>embl-<br>cds: AEG81236 | 50S Ribosomal Protein L28                                       |    | 1  |    | 1  | 2  | 2  |
| G0C Y58;<br>embl-<br>cds: AEG81238 | 50S Ribosomal Protein L32                                       | 1  |    |    | 1  | 2  | 1  |
| G0C Y59;<br>embl-<br>cds: AEG81239 | Two-Component System Transcriptional Regulatory Protein         | 3  | 2  | 3  | 5  | 6  | 6  |

|                                   |                                               |    |    |   |    |    |    |
|-----------------------------------|-----------------------------------------------|----|----|---|----|----|----|
| G0CY67;<br>embl-<br>cds: AEG81247 | Utp--Glucose-1-Phosphate<br>Uridyltransferase |    |    |   | 1  | 1  | 1  |
| G0CY83;<br>embl-<br>cds: AEG81263 | Uncharacterized Protein                       |    |    |   | 5  | 6  | 4  |
| G0CYA4;<br>embl-<br>cds: AEG81281 | 50S Ribosomal Protein L25                     |    | 1  | 1 | 2  | 3  | 3  |
| G0CYC4;<br>embl-<br>cds: AEG82393 | Hypoxanthine<br>Phosphoribosyltransferase     | 1  | 1  |   | 2  | 3  | 3  |
| G0CYC7;<br>embl-<br>cds: AEG82396 | Inorganic Pyrophosphatase                     |    |    |   | 5  | 5  | 4  |
| G0CYH1;<br>embl-<br>cds: AEG82442 | Purine<br>Phosphoribosyltransferase           | 1  | 1  | 2 | 2  | 5  | 4  |
| G0CYH2;<br>embl-<br>cds: AEG82443 | Putative Membrane Protein                     | 10 | 10 | 9 | 8  | 8  | 13 |
| G0CYI6; embl-<br>cds: AEG82457    | Adenylosuccinate Synthetase                   |    |    |   | 1  | 1  | 2  |
| G0CYJ1; embl-<br>cds: AEG81283    | Ribose-Phosphate<br>Pyrophosphokinase         |    |    | 1 | 4  | 6  | 7  |
| G0CYK0;<br>embl-<br>cds: AEG81292 | Enolase                                       | 3  | 2  | 2 | 11 | 8  | 12 |
| G0CYK9;<br>embl-<br>cds: AEG81301 | Transcription Elongation Factor<br>Grea       | 1  |    | 1 | 3  | 3  | 4  |
| G0CYM4;<br>embl-<br>cds: AEG81317 | Fumarate Hydratase Class Ii                   | 2  | 2  | 2 | 13 | 12 | 11 |
| G0CYQ3;<br>embl-<br>cds: AEG81345 | Putative Secreted Protein                     | 5  | 4  | 6 | 5  | 5  | 5  |
| G0CYQ5;<br>embl-<br>cds: AEG81347 | Uncharacterized Protein                       |    |    |   | 2  | 2  | 6  |
| G0CYQ7;<br>embl-<br>cds: AEG81349 | Uncharacterized Protein                       | 1  | 1  | 2 | 9  | 4  | 14 |
| G0CYS8;<br>embl-<br>cds: AEG82468 | Fructose-Bisphosphate Aldolase                | 2  | 2  |   | 9  | 10 | 10 |
| G0CYV5;<br>embl-<br>cds: AEG82498 | Alcohol Dehydrogenase                         |    | 2  | 1 | 6  | 6  | 6  |
| G0CYV6;<br>embl-<br>cds: AEG82499 | Aldehyde Dehydrogenase                        | 5  | 3  | 5 | 3  | 9  | 6  |
| G0CYW2;<br>embl-<br>cds: AEG82505 | Chaperone Protein Dnak                        | 6  | 5  | 4 | 20 | 17 | 22 |
| G0CYY1;<br>embl-<br>cds: AEG82523 | Urease Accessory Protein Ureg                 | 1  |    |   | 5  | 5  | 4  |

|                                   |                                                |   |   |    |    |    |    |
|-----------------------------------|------------------------------------------------|---|---|----|----|----|----|
| G0CYY4;<br>embl-<br>cds: AEG82526 | Urease Subunit Alpha                           | 5 | 5 | 7  | 9  | 9  | 8  |
| G0CYY5;<br>embl-<br>cds: AEG82527 | Urease Subunit Beta                            | 3 | 2 | 4  | 4  | 5  | 5  |
| G0CYY6;<br>embl-<br>cds: AEG82528 | Urease Subunit Gamma                           |   |   |    | 2  | 2  | 3  |
| G0CZ4;<br>embl-<br>cds: AEG82536  | Deoxycytidine Triphosphate<br>Deaminase        |   |   |    | 1  | 1  | 1  |
| G0CZ22;<br>embl-<br>cds: AEG81380 | 2-Oxoglutarate Dehydrogenase<br>E1 Component   | 1 | 1 |    | 8  | 12 | 12 |
| G0CZ35;<br>embl-<br>cds: AEG81393 | Atp-Dependent Rna Helicase<br>Dead             |   |   |    | 2  | 3  | 4  |
| G0CZ53;<br>embl-<br>cds: AEG81411 | Uncharacterized Protein                        |   |   | 1  | 6  | 7  | 6  |
| G0CZ57;<br>embl-<br>cds: AEG81415 | Homoserine Dehydrogenase                       |   |   |    | 5  | 5  | 5  |
| G0CZ62;<br>embl-<br>cds: AEG81420 | Peptide Chain Release Factor 1                 | 1 |   |    | 4  | 4  | 4  |
| G0CZ71;<br>embl-<br>cds: AEG81429 | Atp Synthase Subunit Alpha                     | 1 |   | 2  | 6  | 8  | 9  |
| G0CZ73;<br>embl-<br>cds: AEG81431 | Atp Synthase Subunit Beta                      |   | 2 | 2  | 14 | 11 | 9  |
| G0CZ78;<br>embl-<br>cds: AEG81436 | Uncharacterized Protein                        | 1 |   |    | 3  | 3  | 3  |
| G0CZ83;<br>embl-<br>cds: AEG81441 | Uncharacterized Protein                        |   |   |    | 2  | 3  | 1  |
| G0CZ86;<br>embl-<br>cds: AEG81444 | Electron Transfer Flavoprotein<br>Beta Subunit |   |   | 1  | 4  | 2  | 2  |
| G0CZ94;<br>embl-<br>cds: AEG82552 | Phosphoenolpyruvate<br>Carboxykinase [Gtp]     | 1 | 3 | 2  | 13 | 16 | 14 |
| G0CZ95;<br>embl-<br>cds: AEG82553 | Trna (Guanine-N(7))-<br>Methyltransferase      | 1 | 1 | 2  |    | 3  | 2  |
| G0CZA6;<br>embl-<br>cds: AEG82564 | Putative Secreted Protein                      | 1 | 1 | 1  | 2  | 2  | 2  |
| G0CZA9;<br>embl-<br>cds: AEG82567 | Trehalose Corynomycoly<br>Transferase          | 6 | 6 | 10 | 10 | 8  | 10 |
| G0CZB9;<br>embl-<br>cds: AEG82576 | Udp-Galactopyranose Mutase                     | 1 |   | 1  | 5  | 7  | 7  |
| G0CZC6;<br>embl-<br>cds: AEG82583 | Serine--Trna Ligase                            | 1 |   | 1  | 5  | 7  | 5  |

|                                   |                                                                                   |   |   |   |    |    |    |
|-----------------------------------|-----------------------------------------------------------------------------------|---|---|---|----|----|----|
| G0CZC8;<br>embl-<br>cds: AEG82585 | Putative Secreted Protein                                                         | 2 | 4 | 3 | 5  | 3  | 3  |
| G0CZG8;<br>embl-<br>cds: AEG82621 | Uncharacterized Protein                                                           |   | 1 |   | 2  | 4  | 5  |
| G0CZI7; embl-<br>cds: AEG81463    | Aspartyl/Glutamyl-<br>Trna(Asn/Gln)<br>Amidotransferase Subunit B                 |   |   |   | 5  | 5  | 9  |
| G0CZI8; embl-<br>cds: AEG81464    | Uncharacterized Protein                                                           |   |   |   | 1  | 4  | 5  |
| G0CZP6;<br>embl-<br>cds: AEG81523 | 30S Ribosomal Protein S1                                                          | 7 | 7 | 6 | 18 | 15 | 15 |
| G0CZQ1;<br>embl-<br>cds: AEG81528 | Uncharacterized Protein                                                           |   |   | 1 | 2  | 3  | 1  |
| G0CZQ5;<br>embl-<br>cds: AEG82627 | Rod-Shaped Morphology<br>Protein                                                  |   |   |   | 3  | 2  | 2  |
| G0CZQ6;<br>embl-<br>cds: AEG82628 | Thioredoxin                                                                       | 1 |   |   | 2  | 3  | 4  |
| G0CZR3;<br>embl-<br>cds: AEG82636 | 50S Ribosomal Protein L9                                                          |   |   |   | 2  | 2  | 2  |
| G0CZR5;<br>embl-<br>cds: AEG82638 | 30S Ribosomal Protein S6                                                          | 1 | 1 | 1 | 3  | 4  | 4  |
| G0CZU4;<br>embl-<br>cds: AEG82666 | N-Acylglucosamine-6-<br>Phosphate 2-Epimerase                                     |   |   |   | 1  | 4  | 3  |
| G0CZU7;<br>embl-<br>cds: AEG82669 | Putative Secreted Protein                                                         | 7 | 5 | 4 | 6  | 6  | 10 |
| G0CTB4                            | Phenylalanine--Trna Ligase Beta<br>Subunit                                        |   |   |   | 6  | 9  | 10 |
| G0CTB5                            | N-Acetyl-Gamma-Glutamyl-<br>Phosphate Reductase                                   |   |   |   | 1  | 1  | 1  |
| G0CTC2                            | Argininosuccinate Lyase                                                           |   |   |   | 1  | 2  | 2  |
| G0CTC6                            | Uncharacterized Protein                                                           |   |   |   | 2  | 2  | 2  |
| G0CTD1                            | Putative Secreted Protein                                                         |   |   |   | 1  | 2  | 3  |
| G0CTG2                            | Putative Secreted Protein                                                         |   |   |   | 2  | 3  | 1  |
| G0CTG7                            | 6-Phosphogluconate<br>Dehydrogenase,<br>Decarboxylating                           |   |   |   | 6  | 5  | 8  |
| G0CTH4                            | Nadh Dehydrogenase                                                                |   |   |   | 6  | 4  | 4  |
| G0CTI0                            | Putative Secreted Protein                                                         |   |   |   | 2  | 3  | 2  |
| G0CTI6                            | Cobaltochelataase                                                                 |   |   |   | 7  | 11 | 13 |
| G0CTL9                            | Formate--Tetrahydrofolate<br>Ligase                                               |   |   |   | 4  | 3  | 6  |
| G0CTM0                            | Aspartate Ammonia-Lyase                                                           |   |   |   | 6  | 5  | 6  |
| G0CTM7                            | L-Cysteine:1D-Myo-Inositol 2-<br>Amino-2-Deoxy-Alpha-D-<br>Glucopyranoside Ligase |   |   |   | 3  | 3  | 3  |
| G0CTN0                            | Putative Secreted Protein                                                         |   |   |   | 3  | 4  | 5  |
| G0CTQ1                            | Resuscitation-Promoting Factor<br>Interacting Protein                             |   |   |   | 18 | 18 | 15 |



|        |                                                         |  |  |  |    |    |    |
|--------|---------------------------------------------------------|--|--|--|----|----|----|
| G0CTQ3 | Aconitase                                               |  |  |  | 15 | 17 | 17 |
| G0CTR0 | Putative Secreted Lpxtg Protein                         |  |  |  | 9  | 11 | 7  |
| G0CTV6 | Cysteine Desulfurase                                    |  |  |  | 5  | 6  | 9  |
| G0CTW6 | Transketolase                                           |  |  |  | 13 | 13 | 14 |
| G0CTW7 | Transaldolase                                           |  |  |  | 6  | 6  | 6  |
| G0CTX0 | 6-Phosphogluconolactonase                               |  |  |  | 2  | 4  | 6  |
| G0CTX3 | Triosephosphate Isomerase                               |  |  |  | 7  | 5  | 5  |
| G0CTX4 | Phosphoglycerate Kinase                                 |  |  |  | 11 | 15 | 13 |
| G0CTX5 | Glyceraldehyde-3-Phosphate Dehydrogenase                |  |  |  | 8  | 11 | 10 |
| G0CTY2 | Riboflavin Biosynthesis Protein Ribba                   |  |  |  | 1  | 4  | 3  |
| G0CTZ1 | S-Adenosylmethionine Synthase                           |  |  |  | 2  | 4  | 5  |
| G0CTZ4 | Guanylate Kinase                                        |  |  |  | 1  | 2  | 2  |
| G0CTZ7 | Carbamoyl-Phosphate Synthase Large Chain                |  |  |  | 1  | 2  | 1  |
| G0CTZ8 | Carbamoyl-Phosphate Synthase Small Chain                |  |  |  | 2  | 2  | 5  |
| G0CU07 | Xaa-Pro Aminopeptidase                                  |  |  |  | 4  | 2  | 2  |
| G0CU16 | Dna Polymerase Iii Subunit Beta                         |  |  |  | 2  | 5  | 4  |
| G0CU26 | Alanine--Trna Ligase                                    |  |  |  | 1  | 4  | 5  |
| G0CU29 | Aspartyl-Trna Synthetase                                |  |  |  | 9  | 10 | 9  |
| G0CU36 | L-Serine Dehydratase                                    |  |  |  | 4  | 5  | 5  |
| G0CU39 | Probable Thiol Peroxidase                               |  |  |  | 5  | 6  | 5  |
| G0CU40 | Peptidyl-Prolyl Cis-Trans Isomerase                     |  |  |  | 2  | 3  | 4  |
| G0CU46 | Protein Translocase Subunit Secd                        |  |  |  | 3  | 3  | 4  |
| G0CU62 | Putative Secreted Protein                               |  |  |  | 1  | 4  | 3  |
| G0CU63 | Putative Secreted Protein                               |  |  |  | 3  | 4  | 7  |
| G0CU64 | Putative Secreted Protein                               |  |  |  | 2  | 1  | 2  |
| G0CU69 | Uncharacterized Protein                                 |  |  |  | 1  | 6  | 6  |
| G0CU75 | Uncharacterized Protein                                 |  |  |  | 3  | 3  | 5  |
| G0CU90 | Udp-Glucose 4-Epimerase                                 |  |  |  | 6  | 8  | 7  |
| G0CUA4 | Putative Secreted Protein                               |  |  |  | 7  | 8  | 6  |
| G0CUA9 | Peptidyl-Prolyl Cis-Trans Isomerase                     |  |  |  | 6  | 6  | 7  |
| G0CUC9 | Phospholipase D                                         |  |  |  | 7  | 7  | 10 |
| G0CUD3 | Iron-Siderophore Binding Protein                        |  |  |  | 8  | 5  | 6  |
| G0CUD5 | Serine/Threonine Protein Kinase                         |  |  |  | 2  | 4  | 3  |
| G0CUD6 | Serine/Threonine Protein Kinase                         |  |  |  | 3  | 2  | 1  |
| G0CUE4 | Putative Secreted Protein                               |  |  |  | 2  | 1  | 2  |
| G0CUF8 | Uncharacterized Protein                                 |  |  |  | 2  | 1  | 2  |
| G0CUI2 | Putative Secreted Protein                               |  |  |  | 3  | 6  | 3  |
| G0CUI4 | Phosphoenolpyruvate-Protein Phosphotransferase          |  |  |  | 6  | 10 | 9  |
| G0CUK2 | Trna-2-Methylthio-N(6)-Dimethylallyl adenosine Synthase |  |  |  | 1  | 1  | 3  |
| G0CUM3 | Inosine-Uridine Preferring Nucleoside Hydrolase         |  |  |  | 1  | 2  | 2  |
| G0CUN5 | Putative Secreted Protein                               |  |  |  | 1  | 1  | 1  |

|        |                                                                     |  |  |  |    |    |    |
|--------|---------------------------------------------------------------------|--|--|--|----|----|----|
| G0CUN6 | Proline--Trna Ligase                                                |  |  |  | 9  | 6  | 11 |
| G0CUQ2 | Methionine Aminopeptidase                                           |  |  |  | 1  | 1  | 2  |
| G0CUQ3 | Penicillin-Binding Protein                                          |  |  |  | 6  | 10 | 6  |
| G0CUR9 | 1,4-Alpha-Glucan-Branching Enzyme                                   |  |  |  | 40 | 44 | 53 |
| G0CUS0 | Putative Secreted Protein                                           |  |  |  | 13 | 14 | 13 |
| G0CUU7 | Putative Secreted Protein                                           |  |  |  | 4  | 4  | 3  |
| G0CUW2 | Glycerol Kinase                                                     |  |  |  | 3  | 5  | 5  |
| G0CUW5 | Probable Zinc Metalloprotease                                       |  |  |  | 4  | 4  | 11 |
| G0CUW6 | Uncharacterized Protein                                             |  |  |  | 4  | 3  | 2  |
| G0CUW9 | Arabinosyl Transferase                                              |  |  |  | 6  | 5  | 5  |
| G0CUX2 | Decaprenylphosphoryl-Beta-D-Ribose 2-Epimerase Component            |  |  |  | 4  | 2  | 5  |
| G0CUY8 | Putative Phenylalanine Aminotransferase                             |  |  |  | 2  | 2  | 3  |
| G0CUZ3 | Uncharacterized Protein                                             |  |  |  | 7  | 5  | 8  |
| G0CUZ9 | Putative Secreted Protein                                           |  |  |  | 1  | 3  | 1  |
| G0CV17 | Ribosome Maturation Factor Rimm                                     |  |  |  | 1  | 1  | 1  |
| G0CV19 | 30S Ribosomal Protein S16                                           |  |  |  | 2  | 2  | 3  |
| G0CV32 | Uncharacterized Protein                                             |  |  |  | 1  | 1  | 3  |
| G0CV33 | Alanine Dehydrogenase                                               |  |  |  | 1  | 1  | 2  |
| G0CV40 | Alpha-1,4 Glucan Phosphorylase                                      |  |  |  | 1  | 7  | 8  |
| G0CV42 | Pyruvate Kinase                                                     |  |  |  | 6  | 7  | 9  |
| G0CV73 | Putative Secreted Protein                                           |  |  |  | 4  | 10 | 6  |
| G0CV77 | Isoleucine--Trna Ligase                                             |  |  |  | 9  | 15 | 13 |
| G0CV81 | Cell Division Protein Sepf                                          |  |  |  | 2  | 3  | 5  |
| G0CVB9 | Deoxyribose-Phosphate Aldolase                                      |  |  |  | 1  | 1  | 1  |
| G0CVC1 | Putative Secreted Lpxtg Protein                                     |  |  |  | 4  | 4  | 3  |
| G0CVC2 | Putative Secreted Protein                                           |  |  |  | 11 | 8  | 8  |
| G0CVC8 | Putative Secreted Lpxtg Protein                                     |  |  |  | 27 | 20 | 19 |
| G0CVD2 | Uncharacterized Protein                                             |  |  |  | 18 | 22 | 24 |
| G0CVD3 | Putative Secreted Protein                                           |  |  |  | 12 | 11 | 11 |
| G0CVD4 | Laminin Subunit Beta-2                                              |  |  |  | 30 | 23 | 27 |
| G0CVF2 | Putative Secreted Protein                                           |  |  |  | 14 | 16 | 17 |
| G0CVF4 | Putative Secreted Protein                                           |  |  |  | 12 | 17 | 21 |
| G0CVG7 | Cell Division Protein                                               |  |  |  | 1  | 1  | 1  |
| G0CVG8 | Udp-N-Acetylmuramate--L-Alanine Ligase                              |  |  |  | 4  | 6  | 5  |
| G0CVH4 | Udp-N-Acetylmuramyl-Tripeptide Synthetase                           |  |  |  | 2  | 3  | 3  |
| G0CVH5 | Penicillin-Binding Protein                                          |  |  |  | 2  | 4  | 4  |
| G0CVI7 | Serine/Threonine Protein Kinase                                     |  |  |  | 8  | 10 | 9  |
| G0CVI8 | Phospho-2-Dehydro-3-Deoxyheptonate Aldolase                         |  |  |  | 2  | 3  | 5  |
| G0CVJ4 | Cell Wall-Associated Hydrolase                                      |  |  |  | 5  | 5  | 10 |
| G0CVJ5 | Putative Secreted Protein                                           |  |  |  | 1  | 2  | 2  |
| G0CVK2 | Asparagine Synthetase                                               |  |  |  | 1  | 1  | 1  |
| G0CVK5 | Putative Cobinamide Kinase/Cobinamide Phosphate Guanylyltransferase |  |  |  | 1  | 1  | 1  |

|        |                                                        |  |  |  |    |    |    |
|--------|--------------------------------------------------------|--|--|--|----|----|----|
| G0CVK9 | Probable Cytosol Aminopeptidase                        |  |  |  | 3  | 4  | 1  |
| G0CVL1 | Dihydrolipoamide Acyltransferase                       |  |  |  | 7  | 5  | 9  |
| G0CVL2 | Glycine Dehydrogenase (Decarboxylating)                |  |  |  | 4  | 6  | 6  |
| G0CVL3 | Aminomethyltransferase                                 |  |  |  | 4  | 6  | 5  |
| G0CVL4 | Glycine Cleavage System H Protein                      |  |  |  | 2  | 1  | 1  |
| G0CVM5 | Glutamine Synthetase                                   |  |  |  | 1  | 5  | 4  |
| G0CVN4 | Threonine Synthase                                     |  |  |  | 1  | 4  | 5  |
| G0CVP4 | Galactokinase                                          |  |  |  | 1  | 3  | 1  |
| G0CVS6 | Uncharacterized Protein                                |  |  |  | 1  | 5  | 3  |
| G0CVS7 | Putative Secreted Protein                              |  |  |  | 20 | 22 | 24 |
| G0CVU5 | Udp-N-Acetylenolpyruvoylglucosamine Reductase          |  |  |  | 2  | 3  | 3  |
| G0CVU6 | Uncharacterized Protein                                |  |  |  | 5  | 3  | 6  |
| G0CVV7 | Putative Secreted Protein                              |  |  |  | 2  | 3  | 3  |
| G0CVW3 | Porphobilinogen Deaminase                              |  |  |  | 2  | 4  | 3  |
| G0CVZ0 | Pyruvate Dehydrogenase E1 Component                    |  |  |  | 11 | 11 | 16 |
| G0CVZ8 | Thiamine Biosynthesis Protein                          |  |  |  | 1  | 2  | 3  |
| G0CW01 | Putative Secreted Protein                              |  |  |  | 1  | 1  | 3  |
| G0CW05 | Putative Secreted Lpxtg Protein                        |  |  |  | 2  | 2  | 2  |
| G0CW08 | Glycine--Trna Ligase                                   |  |  |  | 9  | 14 | 11 |
| G0CW15 | Pyridoxamine Kinase                                    |  |  |  | 3  | 2  | 3  |
| G0CW28 | Peptidyl-Dipeptidase                                   |  |  |  | 6  | 7  | 11 |
| G0CW41 | Putative Secreted Protein                              |  |  |  | 6  | 5  | 6  |
| G0CW50 | Uncharacterized Protein                                |  |  |  | 3  | 9  | 7  |
| G0CW57 | Uncharacterized Protein                                |  |  |  | 4  | 1  | 3  |
| G0CW66 | Uncharacterized Protein                                |  |  |  | 4  | 5  | 4  |
| G0CW80 | Transcription Termination/Antitermination Protein Nusg |  |  |  | 5  | 6  | 4  |
| G0CW88 | Putative Secreted Lpxtg Protein                        |  |  |  | 1  | 3  | 2  |
| G0CW93 | Putative Secreted Protein                              |  |  |  | 19 | 12 | 13 |
| G0CW96 | Dna-Directed Rna Polymerase                            |  |  |  | 24 | 25 | 31 |
| G0CW98 | Putative Secreted Lpxtg Protein                        |  |  |  | 3  | 6  | 7  |
| G0CWA6 | Putative Membrane Protein                              |  |  |  | 3  | 4  | 4  |
| G0CWE4 | Non-Specific Acid Phosphatase                          |  |  |  | 13 | 15 | 14 |
| G0CWE6 | 50S Ribosomal Protein L6                               |  |  |  | 4  | 4  | 4  |
| G0CWF2 | Uncharacterized Protein                                |  |  |  | 3  | 5  | 4  |
| G0CWF3 | Uncharacterized Protein                                |  |  |  | 8  | 3  | 5  |
| G0CWF8 | Uncharacterized Protein                                |  |  |  | 10 | 12 | 12 |
| G0CWF9 | Uncharacterized Protein                                |  |  |  | 1  | 1  | 3  |
| G0CWH0 | Putative Secreted Protein                              |  |  |  | 7  | 6  | 6  |
| G0CW18 | Single-Stranded Dna-Binding Protein                    |  |  |  | 1  | 2  | 3  |
| G0CWK7 | Ribosomal Silencing Factor Rsfs                        |  |  |  | 2  | 1  | 1  |
| G0CWL0 | Uncharacterized Protein                                |  |  |  | 1  | 3  | 4  |
| G0CWL9 | Nucleoside Diphosphate Kinase                          |  |  |  | 3  | 3  | 5  |
| G0CWM3 | Valine--Trna Ligase                                    |  |  |  | 9  | 8  | 13 |

|        |                                                      |  |  |  |    |    |    |
|--------|------------------------------------------------------|--|--|--|----|----|----|
| G0CWN1 | Trigger Factor                                       |  |  |  | 6  | 7  | 10 |
| G0CWN4 | Putative Secreted Protein                            |  |  |  | 2  | 2  | 1  |
| G0CWP3 | Adenylate Kinase                                     |  |  |  | 5  | 6  | 8  |
| G0CWP5 | Sialidase                                            |  |  |  | 17 | 14 | 16 |
| G0CWP6 | Putative Secreted Protein                            |  |  |  | 7  | 6  | 7  |
| G0CWS8 | 60 Kda Chaperonin                                    |  |  |  | 11 | 11 | 11 |
| G0CWT2 | Uncharacterized Protein                              |  |  |  | 1  | 1  | 1  |
| G0CWT4 | Inosine-5'-Monophosphate Dehydrogenase               |  |  |  | 1  | 4  | 2  |
| G0CWT8 | Gmp Synthase [Glutamine-Hydrolyzing]                 |  |  |  | 9  | 9  | 9  |
| G0CWU7 | Putative Secreted Protein                            |  |  |  | 7  | 8  | 9  |
| G0CWU8 | Uncharacterized Protein                              |  |  |  | 4  | 3  | 4  |
| G0CWW1 | Manganese Abc Transporter, Substrate-Binding Protein |  |  |  | 3  | 5  | 5  |
| G0CWW7 | Bifunctional Protein Fold                            |  |  |  | 2  | 2  | 1  |
| G0CWW2 | Cell-Surface Hemin Receptor                          |  |  |  | 16 | 14 | 15 |
| G0CWW3 | Iron Abc Transport System Substrate-Binding Protein  |  |  |  | 5  | 6  | 8  |
| G0CWX2 | Aminopeptidase N                                     |  |  |  | 4  | 8  | 6  |
| G0CWX8 | Uncharacterized Protein                              |  |  |  | 5  | 5  | 12 |
| G0CWZ3 | Putative Secreted Protein                            |  |  |  | 1  | 2  | 2  |
| G0CWZ4 | Putative Secreted Protein                            |  |  |  | 18 | 20 | 20 |
| G0CWZ5 | Uncharacterized Protein                              |  |  |  | 1  | 1  | 1  |
| G0CX18 | Uncharacterized Protein                              |  |  |  | 1  | 2  | 2  |
| G0CX25 | Fatty Acid Synthase                                  |  |  |  | 17 | 20 | 24 |
| G0CX30 | Uncharacterized Protein                              |  |  |  | 17 | 17 | 17 |
| G0CX36 | Ribonuclease Ph                                      |  |  |  | 2  | 2  | 3  |
| G0CX49 | Isocitrate Dehydrogenase                             |  |  |  | 13 | 24 | 22 |
| G0CX54 | Venom Serine Protease Kn13                           |  |  |  | 3  | 5  | 4  |
| G0CX59 | Uncharacterized Protein                              |  |  |  | 2  | 4  | 2  |
| G0CX68 | Pyruvate Carboxylase                                 |  |  |  | 10 | 17 | 15 |
| G0CX71 | Acyl-Coa Carboxylase Alpha Subunit                   |  |  |  | 15 | 17 | 13 |
| G0CX72 | Sulfurtransferase                                    |  |  |  | 3  | 4  | 8  |
| G0CX73 | Uncharacterized Protein                              |  |  |  | 6  | 3  | 4  |
| G0CX80 | Acyl-Coa Carboxylase Complex Subunit                 |  |  |  | 2  | 4  | 3  |
| G0CX95 | Putative Secreted Protein                            |  |  |  | 12 | 14 | 14 |
| G0CX96 | Uncharacterized Protein                              |  |  |  | 2  | 3  | 2  |
| G0CXA3 | Phosphomannomutase                                   |  |  |  | 3  | 7  | 6  |
| G0CXA5 | Mannose-6-Phosphate Isomerase                        |  |  |  | 2  | 4  | 5  |
| G0CXA8 | Adenosylhomocysteinase                               |  |  |  | 2  | 5  | 4  |
| G0CXB2 | Lipoprotein Lpqb                                     |  |  |  | 7  | 6  | 5  |
| G0CXB4 | Uncharacterized Protein                              |  |  |  | 2  | 2  | 3  |
| G0CXB5 | Protein Translocase Subunit Seca                     |  |  |  | 2  | 4  | 5  |
| G0CXD0 | Putative Secreted Protein                            |  |  |  | 6  | 6  | 10 |
| G0CXF9 | Cysteine Synthase                                    |  |  |  | 12 | 11 | 9  |
| G0CXI0 | Uncharacterized Protein                              |  |  |  | 2  | 2  | 1  |
| G0CXI2 | Phosphoribosylformylglycinamide Cyclo-Ligase         |  |  |  | 2  | 3  | 5  |

|        |                                                            |  |  |  |    |    |    |
|--------|------------------------------------------------------------|--|--|--|----|----|----|
| G0CXJ7 | Phosphoribosylamine--Glycine Ligase                        |  |  |  | 2  | 5  | 4  |
| G0CXK4 | Putative Secreted Protein                                  |  |  |  | 9  | 13 | 13 |
| G0CXL9 | Putative Secreted Protein                                  |  |  |  | 2  | 3  | 2  |
| G0CXM0 | Putative Secreted Protein                                  |  |  |  | 1  | 2  | 1  |
| G0CXM2 | Upf0182 Protein Culc22_00609                               |  |  |  | 9  | 13 | 12 |
| G0CXM5 | Uncharacterized Protein                                    |  |  |  | 4  | 5  | 6  |
| G0CXN6 | Putative Secreted Protein                                  |  |  |  | 10 | 9  | 10 |
| G0CXN7 | Uncharacterized Protein                                    |  |  |  | 2  | 1  | 2  |
| G0CXN9 | Peptide Chain Release Factor 2                             |  |  |  | 1  | 3  | 4  |
| G0CXP7 | Putative Iron Abc Transport System, Solute-Binding Protein |  |  |  | 6  | 7  | 5  |
| G0CXR5 | Phosphoserine Transaminase                                 |  |  |  | 3  | 3  | 2  |
| G0CXS5 | Putative Secreted Protein                                  |  |  |  | 3  | 3  | 4  |
| G0CXS7 | Uncharacterized Protein                                    |  |  |  | 3  | 1  | 1  |
| G0CXT3 | Abc Transporter Solute-Binding Protein                     |  |  |  | 4  | 6  | 4  |
| G0CXU0 | Putative Secreted Lpxtg Protein                            |  |  |  | 7  | 2  | 3  |
| G0CXU1 | Uncharacterized Protein                                    |  |  |  | 3  | 1  | 4  |
| G0CXU8 | Basic 30 Kda Endochitinase                                 |  |  |  | 2  | 5  | 5  |
| G0CXU9 | Putative Adhesin                                           |  |  |  | 2  | 1  | 1  |
| G0CXV6 | Uncharacterized Protein                                    |  |  |  | 5  | 6  | 5  |
| G0CXV7 | Uncharacterized Protein                                    |  |  |  | 4  | 4  | 3  |
| G0CXW1 | Uncharacterized Protein                                    |  |  |  | 3  | 3  | 4  |
| G0CXW2 | Uncharacterized Protein                                    |  |  |  | 8  | 9  | 14 |
| G0CXW6 | Uncharacterized Protein                                    |  |  |  | 4  | 1  | 1  |
| G0CXX2 | Uncharacterized Protein                                    |  |  |  | 3  | 2  | 2  |
| G0CXX8 | Uncharacterized Protein                                    |  |  |  | 6  | 7  | 6  |
| G0CXY6 | Uncharacterized Protein                                    |  |  |  | 1  | 1  | 2  |
| G0CXZ7 | Uncharacterized Protein                                    |  |  |  | 1  | 1  | 1  |
| G0CY02 | Cysteine--Trna Ligase                                      |  |  |  | 1  | 3  | 5  |
| G0CY07 | Putative Secreted Protein                                  |  |  |  | 11 | 11 | 15 |
| G0CY14 | Atp-Dependent Clp Protease Atp-Binding Subunit             |  |  |  | 7  | 9  | 13 |
| G0CY17 | Inosine-Uridine Preferring Nucleoside Hydrolase            |  |  |  | 1  | 1  | 2  |
| G0CY21 | Laminin Subunit Beta-4                                     |  |  |  | 6  | 4  | 2  |
| G0CY38 | Glucose-6-Phosphate Isomerase                              |  |  |  | 4  | 5  | 7  |
| G0CY45 | Bifunctional Purine Biosynthesis Protein Purh              |  |  |  | 2  | 7  | 10 |
| G0CY47 | Glutamate Abc Transport System Substrate-Binding Protein   |  |  |  | 6  | 10 | 10 |
| G0CY61 | Trypsin-Like Serine Protease                               |  |  |  | 6  | 8  | 8  |
| G0CY77 | Methionine--Trna Ligase                                    |  |  |  | 2  | 5  | 5  |
| G0CY79 | Resuscitation-Promoting Factor                             |  |  |  | 11 | 14 | 14 |
| G0CY90 | Uncharacterized Protein                                    |  |  |  | 2  | 2  | 2  |
| G0CYA7 | Trypsin-Like Serine Protease                               |  |  |  | 3  | 9  | 6  |
| G0CYA8 | Lysine--Trna Ligase                                        |  |  |  | 2  | 6  | 5  |
| G0CYC6 | D-Alanyl-D-Alanine Carboxypeptidase                        |  |  |  | 7  | 4  | 6  |
| G0CYD0 | Putative Secreted Protein                                  |  |  |  | 11 | 14 | 16 |

|        |                                                                    |  |  |  |    |    |    |
|--------|--------------------------------------------------------------------|--|--|--|----|----|----|
| G0CYD3 | Uncharacterized Protein                                            |  |  |  | 4  | 2  | 4  |
| G0CYD5 | Uncharacterized Protein                                            |  |  |  | 2  | 3  | 2  |
| G0CYE0 | 60 Kda Chaperonin                                                  |  |  |  | 8  | 9  | 14 |
| G0CYE1 | Uncharacterized Protein                                            |  |  |  | 9  | 9  | 7  |
| G0CYE4 | Putative Secreted Protein                                          |  |  |  | 33 | 24 | 27 |
| G0CYF3 | Putative Secreted Protein                                          |  |  |  | 3  | 4  | 2  |
| G0CYG5 | Acetate Kinase                                                     |  |  |  | 10 | 14 | 10 |
| G0CYG6 | Phosphate Acetyltransferase                                        |  |  |  | 7  | 6  | 7  |
| G0CYG7 | Ferredoxin/Ferredoxin-Nadp Reductase                               |  |  |  | 11 | 11 | 13 |
| G0CYH5 | Uncharacterized Protein                                            |  |  |  | 1  | 2  | 3  |
| G0CYH8 | Uncharacterized Protein                                            |  |  |  | 2  | 2  | 2  |
| G0CYI3 | Cytochrome C-552                                                   |  |  |  | 5  | 5  | 9  |
| G0CYI9 | Putative Secreted Protein                                          |  |  |  | 23 | 27 | 27 |
| G0CYJ2 | Bifunctional Protein Glmu                                          |  |  |  | 2  | 1  | 1  |
| G0CYK3 | Uncharacterized Protein                                            |  |  |  | 1  | 2  | 2  |
| G0CYL6 | Serine Hydroxymethyltransferase                                    |  |  |  | 12 | 9  | 13 |
| G0CYM0 | Putative Secreted Protein                                          |  |  |  | 3  | 3  | 3  |
| G0CYM5 | Fructose-1,6-Bisphosphatase                                        |  |  |  | 3  | 7  | 6  |
| G0CYM9 | 4-Hydroxy-3-Methylbut-2-Enyl Diphosphate Reductase                 |  |  |  | 1  | 1  | 2  |
| G0CYN2 | Ribosome-Binding Atpase Ychf                                       |  |  |  | 1  | 6  | 6  |
| G0CYN4 | Uncharacterized Protein                                            |  |  |  | 1  | 1  | 2  |
| G0CYP6 | Putative Secreted Protein                                          |  |  |  | 22 | 20 | 25 |
| G0CYQ2 | Macrolide Export Atp-Binding/Permease Protein                      |  |  |  | 1  | 1  | 2  |
| G0CYQ4 | Uncharacterized Protein                                            |  |  |  | 1  | 3  | 1  |
| G0CYQ6 | Putative Secreted Protein                                          |  |  |  | 8  | 9  | 9  |
| G0CYQ8 | Uncharacterized Protein                                            |  |  |  | 2  | 2  | 2  |
| G0CYR2 | N-Succinyldiaminopimelate Aminotransferase                         |  |  |  | 1  | 1  | 1  |
| G0CYR6 | 2,3,4,5-Tetrahydropyridine-2,6-Dicarboxylate N-Succinyltransferase |  |  |  | 2  | 3  | 2  |
| G0CYS6 | Putative Secreted Lpxtg Protein                                    |  |  |  | 8  | 10 | 10 |
| G0CYS7 | Putative Secreted Protein                                          |  |  |  | 44 | 53 | 53 |
| G0CYT4 | Glycerol-3-Phosphate Dehydrogenase                                 |  |  |  | 2  | 3  | 4  |
| G0CYT6 | Surface-Anchored Protein, Fimbrial Subunit                         |  |  |  | 5  | 8  | 10 |
| G0CYT9 | Surface-Anchored Protein, Fimbrial Subunit                         |  |  |  | 6  | 8  | 12 |
| G0CYU1 | Chaperone Protein Clpb                                             |  |  |  | 2  | 3  | 8  |
| G0CYU5 | Putative Secreted Protein                                          |  |  |  | 2  | 2  | 2  |
| G0CYV0 | Putative Membrane Protein                                          |  |  |  | 2  | 3  | 2  |
| G0CYV2 | Uncharacterized Protein                                            |  |  |  | 17 | 15 | 14 |
| G0CYV7 | Putative Secreted Protein                                          |  |  |  | 1  | 2  | 1  |
| G0CYV8 | Corynebacterial Protease Cp40                                      |  |  |  | 2  | 5  | 2  |
| G0CYW3 | Surface-Anchored Protein, Fimbrial Subunit                         |  |  |  | 42 | 44 | 49 |
| G0CYX0 | Uncharacterized Protein                                            |  |  |  | 5  | 14 | 15 |

|        |                                                 |  |  |  |    |    |    |
|--------|-------------------------------------------------|--|--|--|----|----|----|
| G0CYX8 | Abc Transport System, Substrate-Binding Protein |  |  |  | 5  | 5  | 8  |
| G0CZ02 | Uncharacterized Protein                         |  |  |  | 10 | 16 | 13 |
| G0CZ10 | Uncharacterized Protein                         |  |  |  | 4  | 3  | 4  |
| G0CZ21 | Putative Secreted Protein                       |  |  |  | 1  | 2  | 1  |
| G0CZ55 | Arginine--Trna Ligase                           |  |  |  | 5  | 14 | 13 |
| G0CZ64 | Uncharacterized Protein                         |  |  |  | 2  | 3  | 3  |
| G0CZ80 | Uncharacterized Protein                         |  |  |  | 2  | 3  | 3  |
| G0CZ81 | 1,4-Alpha-Glucan Branching Enzyme Glgb          |  |  |  | 7  | 9  | 7  |
| G0CZA0 | Putative Secreted Protein                       |  |  |  | 4  | 8  | 7  |
| G0CZA3 | Polyketide Synthase                             |  |  |  | 8  | 13 | 11 |
| G0CZA4 | Acyl-Coa Synthetase                             |  |  |  | 26 | 21 | 23 |
| G0CZA5 | Envelope Lipids Regulation Factor               |  |  |  | 2  | 5  | 3  |
| G0CZA7 | Trehalose Corynomycolyl Transferase             |  |  |  | 46 | 49 | 46 |
| G0CZB6 | Putative Secreted Lpxtg Protein                 |  |  |  | 4  | 6  | 4  |
| G0CZB7 | Glycerophosphoryl Diester Phosphodiesterase     |  |  |  | 14 | 20 | 20 |
| G0CZC3 | Putative Secreted Protein                       |  |  |  | 18 | 20 | 20 |
| G0CZD6 | Cell-Surface Hemin Receptor                     |  |  |  | 2  | 4  | 1  |
| G0CZD8 | Sgnh-Hydrolase Family Protein                   |  |  |  | 1  | 2  | 4  |
| G0CZD9 | Uncharacterized Protein                         |  |  |  | 4  | 4  | 5  |
| G0CZE8 | Superoxide Dismutase                            |  |  |  | 5  | 5  | 4  |
| G0CZE9 | Uncharacterized Protein                         |  |  |  | 1  | 2  | 2  |
| G0CZG1 | Putative Secreted Protein                       |  |  |  | 5  | 3  | 3  |
| G0CZH8 | Glutamyl-Trna(Gln) Amidotransferase Subunit A   |  |  |  | 4  | 4  | 7  |
| G0CZI4 | Putative Secreted Protein                       |  |  |  | 15 | 11 | 12 |
| G0CZJ2 | Putative Secreted Protein                       |  |  |  | 9  | 12 | 11 |
| G0CZJ9 | Ketol-Acid Reductoisomerase                     |  |  |  | 6  | 8  | 7  |
| G0CZK0 | Putative Membrane-Anchored Protein              |  |  |  | 1  | 3  | 4  |
| G0CZK4 | D-3-Phosphoglycerate Dehydrogenase              |  |  |  | 2  | 4  | 6  |
| G0CZL2 | Glutamate--Trna Ligase                          |  |  |  | 12 | 9  | 11 |
| G0CZL3 | Uncharacterized Protein                         |  |  |  | 8  | 11 | 11 |
| G0CZL4 | Putative Secreted Protein                       |  |  |  | 11 | 16 | 15 |
| G0CZP7 | Pts System Glucose-Specific Component Ii        |  |  |  | 2  | 5  | 3  |
| G0CZR4 | Single-Stranded Dna-Binding Protein             |  |  |  | 1  | 1  | 2  |
| G0CZR8 | Penicillin-Binding Protein                      |  |  |  | 6  | 10 | 8  |
| G0CZS6 | Cell-Surface Hemin Receptor                     |  |  |  | 1  | 4  | 5  |
| G0CZS7 | Dna Protection During Starvation Protein        |  |  |  | 1  | 2  | 1  |
| G0CZT1 | Putative Membrane Protein                       |  |  |  | 5  | 7  | 5  |
| G0CZT2 | Leucine--Trna Ligase                            |  |  |  | 14 | 16 | 18 |
| G0CZT5 | Putative Secreted Protein                       |  |  |  | 5  | 5  | 5  |
| G0CZT8 | Htaa Protein                                    |  |  |  | 3  | 4  | 4  |
| G0CZU1 | Putative Secreted Lpxtg Protein                 |  |  |  | 5  | 6  | 5  |
| G0CZU2 | Glucosamine-6-Phosphate Deaminase               |  |  |  | 2  | 2  | 2  |

|        |                                     |  |  |  |   |   |   |
|--------|-------------------------------------|--|--|--|---|---|---|
| G0CZU5 | N-Acetylglucosamine Kinase          |  |  |  | 1 | 1 | 1 |
| G0CZV1 | Dihydrodipicolinate Synthase        |  |  |  | 2 | 2 | 6 |
| G0CZV2 | Putative Secreted Protein           |  |  |  | 3 | 3 | 4 |
| G0CZV5 | 4-Aminobutyrate<br>Aminotransferase |  |  |  | 2 | 3 | 6 |
| G0CZV7 | Uncharacterized Protein             |  |  |  | 2 | 5 | 3 |
| G0CZW4 | Upf0371 Protein Culc22_02319        |  |  |  | 2 | 3 | 6 |
| G0CZY6 | Putative Secreted Protein           |  |  |  | 2 | 2 | 7 |
| G0CZY9 | Thioredoxin Reductase               |  |  |  | 2 | 4 | 3 |

Supplementary table 2. List of proteins identified as cell surface proteins of *C. ulcerans* 809 and BR-AD22. Accession numbers, description and identified peptides per sample.

| Secretome proteins |                                        | <i>Corynebacterium ulcerans</i> 809 |               |               | <i>Corynebacterium ulcerans</i> BR-AD22 |               |               |
|--------------------|----------------------------------------|-------------------------------------|---------------|---------------|-----------------------------------------|---------------|---------------|
| Accession          | Description                            | Peptides<br>1                       | Peptides<br>2 | Peptides<br>3 | Peptides<br>1                           | Peptides<br>2 | Peptides<br>3 |
| embl-cds:AEG80555  | Putative Secreted Protein              | 1                                   | 1             | 2             |                                         |               |               |
| embl-cds:AEG80558  | Hypothetical Protein                   | 5                                   | 1             | 2             |                                         |               |               |
| embl-cds:AEG80559  | Peptidyl-Prolyl Cis-Trans<br>Isomerase | 3                                   | 1             | 1             |                                         |               |               |
| embl-cds:AEG80585  | Iron-Siderophore Binding<br>Protein    | 3                                   | 2             | 6             |                                         |               |               |
| embl-cds:AEG80589  | Penicillin-Binding Protein             | 4                                   | 4             | 3             |                                         |               |               |
| embl-cds:AEG80616  | Anti-Sigma Factor                      | 1                                   | 2             | 2             |                                         |               |               |
| embl-cds:AEG80629  | Putative Secreted Protein              | 7                                   | 7             | 6             |                                         |               |               |
| embl-cds:AEG80637  | Putative Secreted Protein              | 8                                   | 6             | 5             |                                         |               |               |
| embl-cds:AEG80639  | 1,4-Alpha-Glucan-Branching<br>Enzyme   | 3                                   | 5             | 9             |                                         |               |               |
| embl-cds:AEG80657  | Hypothetical Protein                   | 3                                   | 1             | 3             |                                         |               |               |
| embl-cds:AEG80681  | Glycerol Kinase                        | 4                                   | 1             | 1             |                                         |               |               |
| embl-cds:AEG80685  | Hypothetical Protein                   | 2                                   | 2             | 2             |                                         |               |               |
| embl-cds:AEG80713  | Hypothetical Protein                   | 1                                   | 2             | 2             |                                         |               |               |
| embl-cds:AEG80719  | Putative Secreted Protein              | 2                                   | 1             | 3             |                                         |               |               |
| embl-cds:AEG80744  | Hypothetical Protein                   | 1                                   | 1             | 1             |                                         |               |               |
| embl-cds:AEG80748  | Laminin Subunit Beta-1                 | 4                                   | 5             | 5             |                                         |               |               |
| embl-cds:AEG80754  | Deoxyribose-Phosphate<br>Aldolase      | 1                                   | 2             | 3             |                                         |               |               |
| embl-cds:AEG80756  | Putative Secreted Lpxtg Protein        | 4                                   | 3             | 4             |                                         |               |               |
| embl-cds:AEG80757  | Putative Secreted Protein              | 22                                  | 24            | 33            |                                         |               |               |
| embl-cds:AEG80768  | Putative Secreted Protein              | 1                                   | 3             | 2             |                                         |               |               |



|                   |                                                                      |    |    |    |  |  |  |
|-------------------|----------------------------------------------------------------------|----|----|----|--|--|--|
| embl-cds:AEG80769 | Laminin Subunit Beta-2                                               | 10 | 10 | 15 |  |  |  |
| embl-cds:AEG80780 | Putative Membrane Protein                                            | 5  | 5  | 6  |  |  |  |
| embl-cds:AEG80781 | Putative Secreted Protein                                            | 3  | 2  | 2  |  |  |  |
| embl-cds:AEG80785 | Putative Secreted Protein                                            | 9  | 7  | 11 |  |  |  |
| embl-cds:AEG80821 | Putative Secreted Protein                                            | 8  | 6  | 6  |  |  |  |
| embl-cds:AEG80850 | Putative Secreted Protein                                            | 6  | 4  | 4  |  |  |  |
| embl-cds:AEG80904 | Putative Secreted Protein                                            | 1  | 1  | 2  |  |  |  |
| embl-cds:AEG80905 | Putative Secreted Protein                                            | 3  | 3  | 4  |  |  |  |
| embl-cds:AEG80907 | Dna-Directed Rna Polymerase Beta' Subunit                            | 3  | 4  | 5  |  |  |  |
| embl-cds:AEG80909 | Putative Secreted Lpxtg Protein                                      | 2  | 2  | 2  |  |  |  |
| embl-cds:AEG80955 | Non-Specific Acid Phosphatase                                        | 4  | 6  | 8  |  |  |  |
| embl-cds:AEG80957 | 50S Ribosomal Protein L6                                             | 2  | 2  | 3  |  |  |  |
| embl-cds:AEG80969 | Hypothetical Protein                                                 | 1  | 2  | 2  |  |  |  |
| embl-cds:AEG80972 | Adenylate Kinase                                                     | 7  | 7  | 6  |  |  |  |
| embl-cds:AEG80974 | Sialidase Precursor                                                  | 16 | 12 | 12 |  |  |  |
| embl-cds:AEG80975 | Putative Secreted Protein                                            | 3  | 2  | 2  |  |  |  |
| embl-cds:AEG81006 | Molecular Chaperone                                                  | 4  | 4  | 4  |  |  |  |
| embl-cds:AEG81014 | Gmp Synthase                                                         | 1  | 1  | 1  |  |  |  |
| embl-cds:AEG81023 | Putative Secreted Protein                                            | 2  | 2  | 2  |  |  |  |
| embl-cds:AEG81038 | Cell-Surface Hemin Receptor                                          | 2  | 1  | 2  |  |  |  |
| embl-cds:AEG81044 | Isocitrate Dehydrogenase                                             | 14 | 9  | 9  |  |  |  |
| embl-cds:AEG81049 | Venom Serine Protease Kn13                                           | 1  | 1  | 1  |  |  |  |
| embl-cds:AEG81065 | Acyl-Coa Carboxylase Alpha Subunit                                   | 6  | 5  | 7  |  |  |  |
| embl-cds:AEG81067 | Hypothetical Protein                                                 | 6  | 4  | 6  |  |  |  |
| embl-cds:AEG81071 | Ribokinase                                                           | 1  | 1  | 1  |  |  |  |
| embl-cds:AEG81085 | Putative Iron Compound Abc Transporter Iron Compound Binding Protein | 1  | 1  | 2  |  |  |  |
| embl-cds:AEG81091 | Putative Secreted Protein                                            | 9  | 7  | 7  |  |  |  |
| embl-cds:AEG81099 | Phosphomannomutase                                                   | 3  | 2  | 1  |  |  |  |
| embl-cds:AEG81107 | Putative Secreted Protein                                            | 2  | 1  | 1  |  |  |  |

|                   |                                                                |   |   |   |  |  |  |
|-------------------|----------------------------------------------------------------|---|---|---|--|--|--|
| embl-cds:AEG81115 | Hypothetical Protein                                           | 2 | 1 | 4 |  |  |  |
| embl-cds:AEG81125 | Putative Secreted Protein                                      | 1 | 2 | 4 |  |  |  |
| embl-cds:AEG81137 | Hypothetical Protein                                           | 1 | 1 | 2 |  |  |  |
| embl-cds:AEG81138 | Putative Secreted Protein                                      | 1 | 1 | 1 |  |  |  |
| embl-cds:AEG81141 | Putative Membrane Protein                                      | 6 | 3 | 7 |  |  |  |
| embl-cds:AEG81154 | Putative Secreted Protein                                      | 3 | 1 | 3 |  |  |  |
| embl-cds:AEG81165 | Ferric Anguibactin-Binding Protein                             | 1 | 1 | 1 |  |  |  |
| embl-cds:AEG81227 | Glutamate Abc Transport System Substrate-Binding Protein       | 1 | 1 | 1 |  |  |  |
| embl-cds:AEG81241 | Trypsin-Like Serine Protease                                   | 5 | 4 | 5 |  |  |  |
| embl-cds:AEG81243 | Hypothetical Protein                                           | 1 | 1 | 1 |  |  |  |
| embl-cds:AEG81259 | Resuscitation-Promoting Factor                                 | 2 | 3 | 3 |  |  |  |
| embl-cds:AEG81272 | Glyceraldehyde 3-Phosphate Dehydrogenase                       | 5 | 3 | 3 |  |  |  |
| embl-cds:AEG81291 | Putative Secreted Protein                                      | 2 | 1 | 1 |  |  |  |
| embl-cds:AEG81313 | Putative Secreted Protein                                      | 1 | 1 | 1 |  |  |  |
| embl-cds:AEG81322 | 4-Hydroxy-3-Methylbut-2-Enyl Diphosphate Reductase             | 2 | 1 | 1 |  |  |  |
| embl-cds:AEG81325 | Hypothetical Protein                                           | 5 | 3 | 3 |  |  |  |
| embl-cds:AEG81338 | Putative Secreted Protein                                      | 5 | 4 | 7 |  |  |  |
| embl-cds:AEG81344 | Macrolide Export Atp-Binding/Permease Protein                  | 1 | 4 | 3 |  |  |  |
| embl-cds:AEG81348 | Putative Secreted Protein                                      | 3 | 2 | 3 |  |  |  |
| embl-cds:AEG81358 | 2,3,4,5-Tetrahydropyridine-2-Carboxylate N-Succinyltransferase | 4 | 2 | 2 |  |  |  |
| embl-cds:AEG81379 | Putative Secreted Protein                                      | 3 | 2 | 4 |  |  |  |
| embl-cds:AEG81413 | Arginyl-Trna Synthetase                                        | 7 | 4 | 3 |  |  |  |
| embl-cds:AEG81419 | Transcription Termination Factor                               | 1 | 1 | 3 |  |  |  |
| embl-cds:AEG81445 | Electron Transfer Flavoprotein Alpha Subunit                   | 2 | 1 | 1 |  |  |  |
| embl-cds:AEG81460 | Putative Secreted Protein                                      | 4 | 3 | 5 |  |  |  |
| embl-cds:AEG81469 | Putative Membrane Protein                                      | 1 | 1 | 1 |  |  |  |
| embl-cds:AEG81476 | Putative Membrane-Anchored Protein                             | 4 | 4 | 3 |  |  |  |
| embl-cds:AEG81488 | Glutamyl-Trna Synthetase                                       | 3 | 1 | 1 |  |  |  |
| embl-cds:AEG81505 | D-Alanine-D-Alanine Ligase                                     | 2 | 1 | 1 |  |  |  |

|                    |                                                                    |   |   |   |  |  |  |
|--------------------|--------------------------------------------------------------------|---|---|---|--|--|--|
| embl-cds: AEG81556 | Putative Secreted Protein                                          | 8 | 6 | 8 |  |  |  |
| embl-cds: AEG81605 | Putative Secreted Protein                                          | 3 | 2 | 1 |  |  |  |
| embl-cds: AEG81645 | Putative Secreted Protein                                          | 4 | 4 | 4 |  |  |  |
| embl-cds: AEG81666 | Resuscitation-Promoting Factor Interacting Protein                 | 7 | 8 | 6 |  |  |  |
| embl-cds: AEG81667 | Hypothetical Protein                                               | 1 | 3 | 3 |  |  |  |
| embl-cds: AEG81668 | Aconitase                                                          | 6 | 4 | 4 |  |  |  |
| embl-cds: AEG81681 | Chromosome-Associated Kinesin Kif4A                                | 1 | 2 | 2 |  |  |  |
| embl-cds: AEG81688 | Hypothetical Protein                                               | 1 | 1 | 1 |  |  |  |
| embl-cds: AEG81733 | Transketolase                                                      | 3 | 2 | 2 |  |  |  |
| embl-cds: AEG81734 | Transaldolase                                                      | 3 | 1 | 3 |  |  |  |
| embl-cds: AEG81740 | Triosephosphate Isomerase                                          | 2 | 5 | 5 |  |  |  |
| embl-cds: AEG81741 | Phosphoglycerate Kinase                                            | 8 | 4 | 6 |  |  |  |
| embl-cds: AEG81742 | Glyceraldehyde 3-Phosphate Dehydrogenase                           | 3 | 2 | 4 |  |  |  |
| embl-cds: AEG81788 | Putative Membrane Protein                                          | 1 | 1 | 2 |  |  |  |
| embl-cds: AEG81792 | Histidyl-Trna Synthetase                                           | 1 | 1 | 1 |  |  |  |
| embl-cds: AEG81794 | Thiol Peroxidase                                                   | 1 | 1 | 3 |  |  |  |
| embl-cds: AEG81795 | Peptidyl-Prolyl Cis-Trans Isomerase                                | 1 | 1 | 1 |  |  |  |
| embl-cds: AEG81836 | Rna Polymerase Sigma Factor A                                      | 1 | 1 | 1 |  |  |  |
| embl-cds: AEG81910 | Putative Secreted Protein                                          | 4 | 3 | 3 |  |  |  |
| embl-cds: AEG81927 | Penicillin-Binding Protein                                         | 5 | 6 | 5 |  |  |  |
| embl-cds: AEG81966 | Signal Recognition Particle Receptor                               | 1 | 1 | 1 |  |  |  |
| embl-cds: AEG82019 | Isoleucyl-Trna Synthetase                                          | 4 | 4 | 2 |  |  |  |
| embl-cds: AEG82025 | Cell Division Protein                                              | 5 | 6 | 5 |  |  |  |
| embl-cds: AEG82027 | Udp-N-Acetylmuramate--Alanine Ligase                               | 2 | 1 | 2 |  |  |  |
| embl-cds: AEG82033 | Udp-N-Acetylmuramoylalanyl-D-Glutamate--2,6-Diaminopimelate Ligase | 1 | 1 | 1 |  |  |  |
| embl-cds: AEG82034 | Penicillin-Binding Protein                                         | 5 | 5 | 5 |  |  |  |
| embl-cds: AEG82047 | Phospho-2-Dehydro-3-Deoxyheptonate Aldolase                        | 2 | 1 | 1 |  |  |  |
| embl-cds: AEG82070 | Dihydrolipoamide Acyltransferase                                   | 1 | 1 | 1 |  |  |  |
| embl-cds: AEG82072 | Glycine Cleavage System T Protein                                  | 4 | 4 | 3 |  |  |  |

|                   |                                                      |    |    |    |  |  |  |
|-------------------|------------------------------------------------------|----|----|----|--|--|--|
| embl-cds:AEG82080 | Iron-Siderophore Binding Protein                     | 2  | 1  | 2  |  |  |  |
| embl-cds:AEG82093 | Threonine Synthase                                   | 4  | 4  | 3  |  |  |  |
| embl-cds:AEG82097 | Heme Oxygenase                                       | 3  | 3  | 2  |  |  |  |
| embl-cds:AEG82103 | Galactokinase                                        | 1  | 1  | 1  |  |  |  |
| embl-cds:AEG82132 | Glycyl-Trna Synthetase                               | 4  | 1  | 1  |  |  |  |
| embl-cds:AEG82157 | Putative Secreted Protein                            | 2  | 1  | 2  |  |  |  |
| embl-cds:AEG82165 | Putative Secreted Protein                            | 5  | 7  | 5  |  |  |  |
| embl-cds:AEG82190 | Hypothetical Protein                                 | 2  | 1  | 2  |  |  |  |
| embl-cds:AEG82205 | Dihydrofolate Synthase / Folylpolyglutamate Synthase | 1  | 1  | 1  |  |  |  |
| embl-cds:AEG82213 | Trigger Factor                                       | 3  | 3  | 4  |  |  |  |
| embl-cds:AEG82238 | Putative Secreted Protein                            | 4  | 4  | 5  |  |  |  |
| embl-cds:AEG82239 | Putative Secreted Protein                            | 6  | 4  | 6  |  |  |  |
| embl-cds:AEG82241 | Corynebacterineae Mycolate Reductase A               | 1  | 1  | 1  |  |  |  |
| embl-cds:AEG82244 | Hypothetical Protein                                 | 3  | 2  | 4  |  |  |  |
| embl-cds:AEG82252 | Fatty Acid Synthase                                  | 8  | 7  | 10 |  |  |  |
| embl-cds:AEG82258 | Hypothetical Protein                                 | 2  | 1  | 1  |  |  |  |
| embl-cds:AEG82283 | Protein Piccolo                                      | 1  | 1  | 1  |  |  |  |
| embl-cds:AEG82284 | Hypothetical Protein                                 | 5  | 4  | 4  |  |  |  |
| embl-cds:AEG82285 | Putative Secreted Protein                            | 5  | 4  | 5  |  |  |  |
| embl-cds:AEG82316 | Putative Secreted Protein                            | 2  | 1  | 2  |  |  |  |
| embl-cds:AEG82337 | Phosphoribosylamine-Glycine Ligase                   | 8  | 6  | 3  |  |  |  |
| embl-cds:AEG82344 | Putative Secreted Protein                            | 7  | 7  | 8  |  |  |  |
| embl-cds:AEG82363 | Putative Secreted Protein                            | 3  | 4  | 3  |  |  |  |
| embl-cds:AEG82375 | Laminin Subunit Alpha-1                              | 11 | 10 | 10 |  |  |  |
| embl-cds:AEG82395 | D-Alanyl-D-Alanine Carboxypeptidase                  | 7  | 5  | 8  |  |  |  |
| embl-cds:AEG82397 | Hypothetical Protein                                 | 1  | 1  | 1  |  |  |  |
| embl-cds:AEG82399 | Putative Secreted Protein                            | 2  | 2  | 2  |  |  |  |
| embl-cds:AEG82407 | Hypothetical Protein                                 | 2  | 2  | 2  |  |  |  |
| embl-cds:AEG82409 | Hypothetical Protein                                 | 2  | 2  | 2  |  |  |  |
| embl-cds:AEG82410 | Hypothetical Protein                                 | 2  | 2  | 2  |  |  |  |

|                    |                                                 |    |    |    |  |  |  |
|--------------------|-------------------------------------------------|----|----|----|--|--|--|
| embl-cds: AEG82411 | Molecular Chaperone                             | 5  | 2  | 4  |  |  |  |
| embl-cds: AEG82436 | Acetate Kinase                                  | 6  | 3  | 5  |  |  |  |
| embl-cds: AEG82437 | Phosphate Acetyltransferase                     | 5  | 5  | 4  |  |  |  |
| embl-cds: AEG82438 | Ferredoxin/Ferredoxin-Nadp Reductase            | 7  | 7  | 6  |  |  |  |
| embl-cds: AEG82447 | Hypothetical Protein                            | 3  | 3  | 3  |  |  |  |
| embl-cds: AEG82448 | Hypothetical Protein                            | 2  | 2  | 2  |  |  |  |
| embl-cds: AEG82449 | Hypothetical Protein                            | 4  | 4  | 4  |  |  |  |
| embl-cds: AEG82454 | Putative Secreted Protein                       | 2  | 1  | 2  |  |  |  |
| embl-cds: AEG82460 | Putative Secreted Protein                       | 12 | 10 | 13 |  |  |  |
| embl-cds: AEG82467 | Putative Secreted Protein                       | 41 | 41 | 44 |  |  |  |
| embl-cds: AEG82474 | Glycerol-3-Phosphate Dehydrogenase              | 3  | 1  | 3  |  |  |  |
| embl-cds: AEG82476 | Surface-Anchored Protein, Fimbrial Subunit      | 2  | 1  | 1  |  |  |  |
| embl-cds: AEG82484 | Laminin Subunit Alpha-2                         | 7  | 7  | 8  |  |  |  |
| embl-cds: AEG82485 | Putative Secreted Protein                       | 7  | 5  | 6  |  |  |  |
| embl-cds: AEG82495 | Hypothetical Protein                            | 14 | 14 | 16 |  |  |  |
| embl-cds: AEG82506 | Surface-Anchored Protein, Fimbrial Subunit      | 5  | 6  | 6  |  |  |  |
| embl-cds: AEG82513 | Hypothetical Protein                            | 1  | 1  | 1  |  |  |  |
| embl-cds: AEG82521 | Abc Transport System, Substrate-Binding Protein | 3  | 4  | 4  |  |  |  |
| embl-cds: AEG82537 | Hypothetical Protein                            | 2  | 1  | 2  |  |  |  |
| embl-cds: AEG82544 | Hypothetical Protein                            | 10 | 7  | 9  |  |  |  |
| embl-cds: AEG82562 | Acyl-Coa Synthetase                             | 17 | 14 | 15 |  |  |  |
| embl-cds: AEG82563 | Envelope Lipids Regulation Factor               | 2  | 2  | 2  |  |  |  |
| embl-cds: AEG82565 | Trehalose Corynomycyl Transferase               | 10 | 5  | 11 |  |  |  |
| embl-cds: AEG82571 | Glycosyltransferase                             | 1  | 1  | 1  |  |  |  |
| embl-cds: AEG82574 | Glycerophosphoryl Diester Phosphodiesterase     | 8  | 7  | 7  |  |  |  |
| embl-cds: AEG82580 | Putative Secreted Protein                       | 10 | 6  | 9  |  |  |  |
| embl-cds: AEG82593 | Cell-Surface Hemin Receptor                     | 4  | 3  | 5  |  |  |  |
| embl-cds: AEG82616 | Housekeeping Sortase                            | 2  | 2  | 1  |  |  |  |
| embl-cds: AEG82641 | Penicillin-Binding Protein                      | 10 | 10 | 9  |  |  |  |
| embl-cds: AEG82649 | Cell-Surface Hemin Receptor                     | 3  | 1  | 3  |  |  |  |

|                             |                                                                                 |   |   |   |   |   |   |
|-----------------------------|---------------------------------------------------------------------------------|---|---|---|---|---|---|
| embl-cds: AEG82655          | Leucyl-Trna Synthetase                                                          | 3 | 2 | 3 |   |   |   |
| embl-cds: AEG82657          | Putative Membrane Protein                                                       | 1 | 1 | 1 |   |   |   |
| G0CTA7;embl - cds: AEG81533 | Translation Initiation Factor If-3                                              |   | 2 | 2 | 1 | 1 | 1 |
| G0CTA8;embl - cds: AEG81534 | 50S Ribosomal Protein L35                                                       | 1 |   |   | 1 | 1 | 1 |
| G0CTA9;embl - cds: AEG81535 | 50S Ribosomal Protein L20                                                       | 1 | 1 | 2 | 3 | 3 | 2 |
| G0CTB3;embl-cds: AEG81538   | Phenylalanine--Trna Ligase Alpha Subunit                                        | 1 |   |   | 6 | 3 | 1 |
| G0CTC1;embl-cds: AEG81546   | Argininosuccinate Synthase                                                      | 2 | 1 | 1 | 6 | 5 | 7 |
| G0CTC3;embl-cds: AEG81548   | Uncharacterized Protein                                                         |   | 1 | 1 | 1 | 1 | 1 |
| G0CTC4;embl-cds: AEG81549   | Tyrosine--Trna Ligase                                                           | 1 |   | 1 | 3 | 2 | 1 |
| G0CTE3;embl-cds: AEG81568   | Gtpase Der                                                                      | 1 |   | 1 | 5 | 1 | 2 |
| G0CTF6;embl-cds: AEG81581   | Uncharacterized Protein                                                         |   |   | 1 | 1 | 1 | 1 |
| G0CTF8;embl-cds: AEG81583   | Inhibitor Of Odh Activity                                                       | 1 | 1 | 1 | 2 | 1 | 3 |
| G0CTI2;embl-cds: AEG81607   | Rna Polymerase-Binding Protein Rbpa                                             |   |   |   | 2 | 1 | 1 |
| G0CTI3;embl-cds: AEG81608   | Polyprenol-Phosphate-Mannose Synthase Domain 1                                  |   |   |   | 1 | 1 | 1 |
| G0CTI8;embl-cds: AEG82714   | Putative Hydrolase                                                              | 1 |   |   | 2 | 3 | 3 |
| G0CTN6;embl - cds: AEG81651 | Dihydroxyacetone Kinase                                                         | 2 | 2 | 1 | 1 | 1 | 1 |
| G0CTP2;embl-cds: AEG81657   | Uncharacterized Protein                                                         |   |   |   | 3 | 3 | 3 |
| G0CTP6;embl-cds: AEG81661   | Putative Secreted Protein                                                       | 1 |   | 2 | 7 | 5 | 7 |
| G0CTQ6;embl - cds: AEG81671 | Upf0237 Protein Culc22_01153                                                    |   |   |   | 1 | 1 | 1 |
| G0CTU9;embl - cds: AEG81716 | Uncharacterized Protein                                                         |   |   |   | 3 | 1 | 1 |
| G0CTV7;embl - cds: AEG81724 | Abc-Type Transport System Involved In Fe-S Cluster Assembly Atp-Binding Protein | 3 | 1 | 2 | 8 | 3 | 4 |
| G0CTX8;embl-cds: AEG81745   | Nucleotide-Binding Protein Culc22_01225                                         |   |   |   | 3 | 1 | 1 |
| G0CTZ3;embl-cds: AEG81759   | Dna-Directed Rna Polymerase Subunit Omega                                       |   |   |   | 1 | 1 | 1 |
| G0CTZ5;embl-cds: AEG81761   | Corynebacterial Integration Host Factor                                         | 2 | 2 | 2 | 4 | 3 | 3 |
| G0CU06;embl-cds: AEG81772   | Elongation Factor Ef-P                                                          | 2 | 2 | 1 | 3 | 2 | 2 |
| G0CU14;embl-cds: AEG81780   | Putative Secreted Protein                                                       | 3 | 4 | 4 | 3 | 3 | 3 |

|                           |                                                          |   |   |    |    |    |    |
|---------------------------|----------------------------------------------------------|---|---|----|----|----|----|
| G0CU19;embl-cds: AEG80547 | Dna Gyrase Subunit B                                     |   |   | 1  | 8  | 4  | 2  |
| G0CU20;embl-cds: AEG80548 | Uncharacterized Protein                                  | 2 | 2 | 2  | 6  | 2  | 2  |
| G0CU23;embl-cds: AEG80551 | Dna Gyrase Subunit A                                     |   |   | 2  | 7  | 1  | 4  |
| G0CU44;embl-cds: AEG81799 | Putative Secreted Protein                                | 2 | 1 | 1  | 2  | 1  | 2  |
| G0CU45;embl-cds: AEG81800 | Protein-Export Membrane Protein Secf                     | 1 |   | 1  | 7  | 4  | 2  |
| G0CU51;embl-cds: AEG81806 | Probable Transcriptional Regulatory Protein Culc22_01288 | 1 | 2 | 1  | 3  | 3  |    |
| G0CU61;embl-cds: AEG81816 | Threonine--Trna Ligase                                   |   |   |    | 4  | 2  | 3  |
| G0CU89;embl-cds: AEG81844 | Dtxr-Family Transcription Regulator                      | 6 | 2 | 3  | 6  | 6  | 7  |
| G0CU95;embl-cds: AEG81850 | Alkyl Hydroperoxide Reductase                            | 2 | 2 | 1  | 3  | 3  | 3  |
| G0CUA2;embl-cds: AEG81857 | Deor-Family Transcription Regulator                      |   |   |    | 1  | 2  | 1  |
| G0CUC6;embl-cds: AEG80578 | Uncharacterized Protein                                  | 2 | 1 | 1  | 4  | 2  | 2  |
| G0CUE0;embl-cds: AEG80592 | Putative Secreted Protein                                |   |   |    | 1  | 2  | 2  |
| G0CUG4;embl-cds: AEG80613 | Uncharacterized Protein                                  | 1 | 1 | 1  | 1  | 1  | 1  |
| G0CUH6;embl-cds: AEG80631 | Uncharacterized Protein                                  | 9 | 9 | 10 | 9  | 8  | 6  |
| G0CUI8;embl-cds: AEG81863 | Phosphocarrier Protein Hpr                               | 3 | 3 | 2  |    | 2  | 1  |
| G0CUK4;embl-cds: AEG81879 | Protein Reca                                             |   | 1 | 1  | 6  | 5  | 4  |
| G0CUK9;embl-cds: AEG81884 | Uncharacterized Protein                                  | 5 | 2 | 5  | 10 | 5  | 8  |
| G0CUM1;embl-cds: AEG81896 | Polyribonucleotide Nucleotidyltransferase                | 1 | 1 | 2  | 15 | 6  | 8  |
| G0CUM2;embl-cds: AEG81897 | 30S Ribosomal Protein S15                                | 2 | 1 | 1  | 3  | 3  | 2  |
| G0CUN0;embl-cds: AEG81905 | Ribosome-Binding Factor A                                | 2 | 1 | 2  | 2  | 1  | 2  |
| G0CUN1;embl-cds: AEG81906 | Translation Initiation Factor If-2                       | 2 | 2 | 3  | 16 | 11 | 10 |
| G0CUN3;embl-cds: AEG81908 | Transcription Termination/Antitermination Protein Nusa   |   |   |    | 2  | 3  | 3  |
| G0CUP3;embl-cds: AEG81918 | Cobalamin Adenosyltransferase                            | 3 |   |    | 2  | 2  | 4  |

|                                   |                                                                                                                |   |   |   |    |   |   |
|-----------------------------------|----------------------------------------------------------------------------------------------------------------|---|---|---|----|---|---|
| G0CUQ4;embl<br>-<br>cds: AEG81928 | 4-Hydroxy-3-Methylbut-2-En-1-<br>Yl Diphosphate Synthase<br>(Flavodoxin)                                       |   |   |   | 5  | 2 | 2 |
| G0CUQ7;embl<br>-<br>cds: AEG81931 | Uncharacterized Protein                                                                                        |   |   | 1 | 3  | 2 | 2 |
| G0CUQ8;embl<br>-<br>cds: AEG81932 | Probable Dual-Specificity Rna<br>Methyltransferase Rlmn                                                        |   |   |   | 2  | 2 | 1 |
| G0CUR1;embl<br>-<br>cds: AEG81935 | Ribosome-Recycling Factor                                                                                      | 3 | 3 | 3 | 4  | 5 | 4 |
| G0CUR2;embl<br>-<br>cds: AEG81936 | Uridylate Kinase                                                                                               | 1 |   |   | 5  | 5 | 4 |
| G0CUR3;embl<br>-<br>cds: AEG81937 | Elongation Factor Ts                                                                                           | 5 | 2 | 4 | 11 | 3 | 5 |
| G0CUR4;embl<br>-<br>cds: AEG81938 | 30S Ribosomal Protein S2                                                                                       | 4 | 2 | 3 | 9  | 5 | 7 |
| G0CUV8;embl<br>-<br>cds: AEG80678 | Uncharacterized Protein                                                                                        |   |   |   | 1  | 1 | 1 |
| G0CUW8;emb<br>l-<br>cds: AEG80687 | Putative Secreted Protein                                                                                      | 7 | 5 | 4 | 7  | 3 | 6 |
| G0CUX1;embl<br>-<br>cds: AEG80690 | Decaprenylphosphoryl-Beta-D-<br>Ribose 2-Epimerase Component                                                   | 1 | 1 | 1 | 5  | 4 | 3 |
| G0CUY4;embl<br>-<br>cds: AEG80703 | Uncharacterized Protein                                                                                        |   |   |   | 1  | 1 | 2 |
| G0CV12;embl-<br>cds: AEG81955     | 50S Ribosomal Protein L19                                                                                      | 2 | 1 | 1 | 4  | 2 | 3 |
| G0CV16;embl-<br>cds: AEG81959     | Trna (Guanine-N(1)-)<br>Methyltransferase                                                                      | 1 | 1 | 1 | 1  | 2 | 2 |
| G0CV31;embl-<br>cds: AEG81974     | Uncharacterized Protein                                                                                        |   | 2 |   | 6  | 7 | 5 |
| G0CV41;embl-<br>cds: AEG81983     | Putative Secreted Protein                                                                                      | 2 | 2 | 2 | 4  | 2 | 1 |
| G0CV49;embl-<br>cds: AEG81991     | 1-(5-Phosphoribosyl)-5-[(5-<br>Phosphoribosylamino)Methylid<br>eneamino] Imidazole-4-<br>Carboxamide Isomerase | 5 | 2 | 1 |    | 3 | 5 |
| G0CV58;embl-<br>cds: AEG82000     | Putative Secreted Protein                                                                                      | 2 | 1 | 3 | 5  | 2 | 1 |
| G0CV68;embl-<br>cds: AEG82010     | Dna-Directed Dna Polymerase                                                                                    |   | 1 | 1 | 1  | 1 | 1 |
| G0CV74;embl-<br>cds: AEG82016     | Putative Secreted Protein                                                                                      | 1 |   | 1 | 1  | 1 | 1 |
| G0CV79;embl-<br>cds: AEG82021     | Uncharacterized Protein                                                                                        | 4 | 2 | 3 | 8  | 7 | 3 |
| G0CV86;embl-<br>cds: AEG80721     | Pyridoxal 5'-Phosphate Synthase<br>Subunit Pdxs                                                                | 1 | 1 | 2 | 5  | 3 | 6 |
| G0CV98;embl-<br>cds: AEG80733     | Uncharacterized Protein                                                                                        | 4 | 1 | 1 |    | 3 | 4 |
| G0CVA1;embl<br>-<br>cds: AEG80736 | Nucleoid-Associated Protein<br>Culc22_00193                                                                    | 2 | 1 |   | 1  | 1 | 1 |



|                                   |                                                             |   |   |   |   |   |   |
|-----------------------------------|-------------------------------------------------------------|---|---|---|---|---|---|
| G0CVB1;embl<br>-<br>cds: AEG80746 | Uncharacterized Protein                                     |   |   |   | 3 | 1 | 1 |
| G0CVC7;embl<br>-<br>cds: AEG80762 | Aspartokinase                                               |   | 2 | 2 | 5 | 1 | 4 |
| G0CVC9;embl<br>-<br>cds: AEG80764 | Aspartate-Semialdehyde<br>Dehydrogenase                     | 2 | 2 | 2 | 2 | 4 | 3 |
| G0CVF9;embl-<br>cds: AEG80790     | Crp-Family Transcription<br>Regulator                       | 1 |   | 3 | 7 | 4 | 2 |
| G0CVG6;embl<br>-<br>cds: AEG80797 | Uncharacterized Protein                                     |   |   | 1 | 2 | 2 | 1 |
| G0CVH1;embl<br>-<br>cds: AEG82030 | Udp-N-Acetylmuramoylalanine-<br>-D-Glutamate Ligase         | 3 | 2 |   | 2 | 3 | 2 |
| G0CVH7;embl<br>-<br>cds: AEG82036 | Ribosomal Rna Small Subunit<br>Methyltransferase H          | 2 | 2 | 2 | 3 | 2 | 2 |
| G0CVI6;embl-<br>cds: AEG82045     | Uncharacterized Protein                                     |   |   |   | 1 | 1 | 2 |
| G0CVJ1;embl-<br>cds: AEG82050     | 1-Acyl-Sn-Glycerol-3-Phosphate<br>Acyltransferase           |   |   |   | 4 | 1 | 1 |
| G0CVJ6;embl-<br>cds: AEG82055     | Ubiquinol-Cytochrome C<br>Reductase Cytochrome B<br>Subunit | 1 |   |   | 6 | 2 | 2 |
| G0CVJ7;embl-<br>cds: AEG82056     | Ubiquinol-Cytochrome C<br>Reductase Iron-Sulfur Subunit     |   | 1 | 1 | 3 | 1 | 3 |
| G0CVK3;embl<br>-<br>cds: AEG82062 | Uncharacterized Protein                                     |   |   |   | 2 | 1 | 1 |
| G0CVK8;embl<br>-<br>cds: AEG82067 | Branched-Chain-Amino-Acid<br>Aminotransferase               | 4 | 3 | 4 | 1 | 4 | 5 |
| G0CVL7;embl<br>-<br>cds: AEG82076 | Lipoyl Synthase                                             |   |   |   | 4 | 2 | 3 |
| G0CVM9;emb<br>l-<br>cds: AEG82088 | Uncharacterized Protein                                     |   |   |   | 8 | 4 | 3 |
| G0CVN0;embl<br>-<br>cds: AEG82089 | Uncharacterized Protein                                     | 2 |   | 1 | 3 | 2 | 1 |
| G0CVR2;embl<br>-<br>cds: AEG80808 | Cold Shock-Like Protein A                                   | 2 |   | 3 | 3 | 2 | 2 |
| G0CVS1;embl-<br>cds: AEG80815     | Putative Secreted Protein                                   | 5 | 4 | 4 | 6 | 8 | 7 |
| G0CVT0;embl<br>-<br>cds: AEG80823 | Dihydrolipoyl Dehydrogenase                                 | 1 | 1 |   | 2 | 2 | 2 |
| G0CVT3;embl<br>-<br>cds: AEG80826 | Succinate Dehydrogenase<br>Flavoprotein Subunit             | 1 | 1 | 1 | 7 | 1 | 2 |
| G0CVT4;embl<br>-<br>cds: AEG80827 | Succinate Dehydrogenase Iron-<br>Sulfur Protein             | 1 | 1 |   | 2 | 1 | 1 |

|                                  |                                                                       |   |   |   |    |    |    |
|----------------------------------|-----------------------------------------------------------------------|---|---|---|----|----|----|
| G0CVT9;embl<br>-<br>cds:AEG80832 | Putative Secreted Protein                                             | 2 | 3 | 2 | 4  | 3  | 3  |
| G0CVU1;embl<br>-<br>cds:AEG80834 | Formate Acetyltransferase                                             | 1 | 1 | 1 | 2  | 2  | 1  |
| G0CVU2;embl<br>-<br>cds:AEG80835 | Formate Acetyltransferase                                             | 1 |   | 1 | 7  | 4  | 2  |
| G0CVU4;embl<br>-<br>cds:AEG80837 | Uncharacterized Protein                                               | 1 | 1 | 1 | 4  | 1  | 2  |
| G0CVU8;embl<br>-<br>cds:AEG80841 | 2,3-Bisphosphoglycerate-<br>Dependent Phosphoglycerate<br>Mutase      | 4 | 1 | 3 | 10 | 4  | 5  |
| G0CVX0;embl<br>-<br>cds:AEG80863 | Uncharacterized Protein                                               | 3 | 1 | 1 | 4  | 2  | 2  |
| G0CW00;embl<br>-<br>cds:AEG82124 | Glutamine--Fructose-6-<br>Phosphate Aminotransferase<br>[Isomerizing] | 1 | 1 | 1 | 5  | 1  | 1  |
| G0CW10;embl<br>-<br>cds:AEG82134 | Fur-Family Transcription<br>Regulator                                 |   |   |   | 4  | 3  | 3  |
| G0CW24;embl<br>-<br>cds:AEG82148 | Uncharacterized Protein                                               | 2 | 1 | 2 | 11 | 5  | 2  |
| G0CW25;embl<br>-<br>cds:AEG82149 | 4-Alpha-Glucanotransferase                                            |   |   |   | 2  | 1  | 2  |
| G0CW81;embl<br>-<br>cds:AEG80892 | 50S Ribosomal Protein L11                                             |   | 1 | 2 | 3  | 2  | 2  |
| G0CW82;embl<br>-<br>cds:AEG80893 | 50S Ribosomal Protein L1                                              | 5 | 2 | 3 | 9  | 7  | 7  |
| G0CW86;embl<br>-<br>cds:AEG80897 | 50S Ribosomal Protein L10                                             |   |   |   | 5  | 2  | 1  |
| G0CW87;embl<br>-<br>cds:AEG80898 | 50S Ribosomal Protein L7/L12                                          | 6 | 5 | 6 | 10 | 7  | 7  |
| G0CW95;embl<br>-<br>cds:AEG80906 | Dna-Directed Rna Polymerase<br>Subunit Beta                           | 1 |   | 1 | 16 | 4  | 5  |
| G0CWB0;embl<br>-<br>cds:AEG80921 | Uncharacterized Protein                                               | 1 | 1 | 1 | 2  | 2  | 3  |
| G0CWB2;embl<br>-<br>cds:AEG80923 | 30S Ribosomal Protein S7                                              | 3 | 4 | 4 | 7  | 5  | 5  |
| G0CWB3;embl<br>-<br>cds:AEG80924 | Elongation Factor G                                                   | 4 | 2 | 3 | 23 | 10 | 9  |
| G0CWB4;embl<br>-<br>cds:AEG80925 | Elongation Factor Tu                                                  | 9 | 9 | 6 | 15 | 9  | 10 |
| G0CWC3;emb<br>l-<br>cds:AEG80934 | 30S Ribosomal Protein S10                                             | 4 | 3 | 3 | 7  | 5  | 5  |

|                                  |                           |   |   |   |    |    |    |
|----------------------------------|---------------------------|---|---|---|----|----|----|
| G0CWC4;emb<br>l-<br>cds:AEG80935 | 50S Ribosomal Protein L3  | 3 | 2 | 1 | 6  | 3  | 4  |
| G0CWC5;emb<br>l-<br>cds:AEG80936 | 50S Ribosomal Protein L4  | 3 | 4 | 5 | 7  | 5  | 5  |
| G0CWC6;emb<br>l-<br>cds:AEG80937 | 50S Ribosomal Protein L23 | 2 | 1 | 1 | 4  | 3  | 3  |
| G0CWC7;emb<br>l-<br>cds:AEG80938 | 50S Ribosomal Protein L2  | 5 | 6 | 8 | 12 | 10 | 10 |
| G0CWC8;emb<br>l-<br>cds:AEG80939 | 30S Ribosomal Protein S19 | 3 | 3 | 3 | 5  | 5  | 5  |
| G0CWC9;emb<br>l-<br>cds:AEG80940 | 50S Ribosomal Protein L22 | 3 | 6 | 6 | 5  | 6  | 6  |
| G0CWD0;emb<br>l-<br>cds:AEG80941 | 30S Ribosomal Protein S3  | 3 | 3 | 6 | 9  | 5  | 6  |
| G0CWD1;emb<br>l-<br>cds:AEG80942 | 50S Ribosomal Protein L16 |   |   | 2 | 3  | 2  | 2  |
| G0CWD2;emb<br>l-<br>cds:AEG80943 | 50S Ribosomal Protein L29 |   | 1 |   | 4  | 4  | 5  |
| G0CWD3;emb<br>l-<br>cds:AEG80944 | 30S Ribosomal Protein S17 | 1 | 2 | 3 | 5  | 3  | 3  |
| G0CWD4;emb<br>l-<br>cds:AEG80945 | Putative Secreted Protein |   |   |   | 3  | 6  | 8  |
| G0CWD8;emb<br>l-<br>cds:AEG80949 | 50S Ribosomal Protein L14 | 2 | 1 | 2 | 4  | 2  | 3  |
| G0CWD9;emb<br>l-<br>cds:AEG80950 | 50S Ribosomal Protein L24 |   |   |   | 6  | 3  | 2  |
| G0CWE0;embl<br>-<br>cds:AEG80951 | 50S Ribosomal Protein L5  | 4 | 2 | 3 | 7  | 7  | 5  |
| G0CWE5;embl<br>-<br>cds:AEG80956 | 30S Ribosomal Protein S8  | 2 | 1 | 1 | 7  | 3  | 4  |
| G0CWE7;embl<br>-<br>cds:AEG80958 | 50S Ribosomal Protein L18 | 2 | 2 | 1 | 1  | 2  | 2  |
| G0CWE8;embl<br>-<br>cds:AEG80959 | 30S Ribosomal Protein S5  | 2 | 2 | 2 | 6  | 3  | 3  |
| G0CWJ9;embl<br>-<br>cds:AEG82182 | 30S Ribosomal Protein S20 | 1 | 1 | 1 | 2  | 1  | 1  |
| G0CWL5;embl<br>-<br>cds:AEG82198 | 50S Ribosomal Protein L27 | 2 | 2 | 3 | 5  | 4  | 2  |
| G0CWL6;embl<br>-<br>cds:AEG82199 | 50S Ribosomal Protein L21 | 3 | 2 | 3 | 3  | 3  | 4  |

|                                  |                                                   |   |   |   |    |   |   |
|----------------------------------|---------------------------------------------------|---|---|---|----|---|---|
| G0CWM4;emb<br>l-<br>cds:AEG82207 | Malate Dehydrogenase                              | 5 | 2 | 3 | 5  | 6 | 4 |
| G0CWM9;emb<br>l-<br>cds:AEG82211 | Atp-Dependent Clp Protease<br>Proteolytic Subunit | 1 | 1 | 1 | 1  | 1 | 1 |
| G0CWN0;emb<br>l-<br>cds:AEG82212 | Atp-Dependent Clp Protease<br>Proteolytic Subunit |   |   |   | 1  | 1 | 1 |
| G0CWN2;emb<br>l-<br>cds:AEG80960 | 50S Ribosomal Protein L30                         | 1 | 1 | 2 | 5  | 3 | 4 |
| G0CWN3;emb<br>l-<br>cds:AEG80961 | 50S Ribosomal Protein L15                         | 2 | 4 | 2 | 6  | 2 | 4 |
| G0CWN5;emb<br>l-<br>cds:AEG80963 | Maltotriose-Binding Protein                       | 5 | 5 | 6 | 6  | 3 | 6 |
| G0CWP8;embl<br>-<br>cds:AEG80977 | 30S Ribosomal Protein S13                         | 2 | 2 | 3 | 3  | 3 | 2 |
| G0CWP9;embl<br>-<br>cds:AEG80978 | 30S Ribosomal Protein S11                         |   |   |   | 4  | 1 | 2 |
| G0CWQ0;emb<br>l-<br>cds:AEG80979 | 30S Ribosomal Protein S4                          |   | 3 | 3 | 12 | 5 | 7 |
| G0CWQ1;emb<br>l-<br>cds:AEG80980 | Dna-Directed Rna Polymerase<br>Subunit Alpha      | 1 | 2 | 3 | 4  | 1 | 2 |
| G0CWQ2;emb<br>l-<br>cds:AEG80981 | 50S Ribosomal Protein L17                         | 2 | 3 | 3 | 7  | 4 | 5 |
| G0CWR3;emb<br>l-<br>cds:AEG80991 | 50S Ribosomal Protein L13                         | 2 | 2 | 3 | 3  | 3 | 3 |
| G0CWR4;emb<br>l-<br>cds:AEG80992 | 30S Ribosomal Protein S9                          | 2 | 2 | 2 | 6  | 6 | 2 |
| G0CWR5;emb<br>l-<br>cds:AEG80993 | Phosphoglucosamine Mutase                         |   |   |   | 3  | 1 | 1 |
| G0CWR9;emb<br>l-<br>cds:AEG80997 | Uncharacterized Protein                           |   |   |   | 3  | 3 | 3 |
| G0CWS7;embl<br>-<br>cds:AEG81005 | 10 Kda Chaperonin                                 | 2 | 1 | 2 | 4  | 4 | 4 |
| G0CWT5;embl<br>-<br>cds:AEG81012 | Uncharacterized Protein                           | 2 |   |   | 5  | 6 | 6 |
| G0CWU3;emb<br>l-<br>cds:AEG81019 | Putative Secreted Protein                         | 2 | 3 | 3 | 3  |   | 1 |
| G0CWW8;em<br>bl-<br>cds:AEG82215 | Uncharacterized Protein                           |   |   |   | 2  | 2 | 2 |
| G0CWX0;emb<br>l-<br>cds:AEG82217 | Ribose 5-Phosphate Isomerase                      | 2 | 2 | 2 | 4  | 1 | 4 |

|                            |                                                              |   |   |   |   |   |   |
|----------------------------|--------------------------------------------------------------|---|---|---|---|---|---|
| G0CWZ7;embl-cds: AEG82242  | Oligoribonuclease                                            | 2 | 1 | 1 | 3 | 1 | 2 |
| G0CX20;embl-cds: AEG82247  | Uncharacterized Protein                                      | 2 | 2 |   | 2 | 2 | 2 |
| G0CX21;embl-cds: AEG82248  | Uncharacterized Protein                                      | 1 |   |   | 3 | 3 | 3 |
| G0CX22;embl-cds: AEG82249  | Bacterioferritin Comigratory Protein                         | 2 | 2 | 1 | 1 | 2 | 2 |
| G0CX40;embl-cds: AEG82263  | Uncharacterized Protein                                      |   |   |   | 4 | 2 | 1 |
| G0CX62;embl-cds: AEG81057  | Uracil Phosphoribosyltransferase                             | 2 |   | 1 | 2 | 2 | 2 |
| G0CX66;embl-cds: AEG81061  | Dihydrolipoamide Dehydrogenase                               |   |   |   | 5 | 3 | 5 |
| G0CX81;embl-cds: AEG81075  | Acyl-Coa Carboxylase Complex Subunit                         | 1 |   | 1 | 8 | 4 | 4 |
| G0CX97;embl-cds: AEG81093  | Lytr-Family Transcription Regulator                          | 3 | 5 | 4 | 2 | 3 | 2 |
| G0CX99;embl-cds: AEG81095  | Mannose-1-Phosphate Guanylttransferase                       |   |   | 1 | 1 | 3 | 3 |
| G0CXB7;embl-cds: AEG81112  | Uncharacterized Protein                                      | 2 | 2 | 2 | 3 | 1 | 2 |
| G0CXB9;embl-cds: AEG81114  | Uncharacterized Protein                                      |   |   | 1 | 5 | 3 | 3 |
| G0CXC9;embl-cds: AEG81124  | Putative Secreted Protein                                    | 2 | 4 | 3 | 2 | 3 | 2 |
| G0CXD1;embl-cds: AEG82272  | Cytochrome C Oxidase Subunit I                               |   |   | 1 | 4 | 1 | 2 |
| G0CXD5;embl-cds: AEG82276  | Ribonucleoside-Diphosphate Reductase                         |   |   |   | 9 | 3 | 3 |
| G0CXF7;embl-cds: AEG82297  | Luxr-Family Transcription Regulator                          | 1 |   | 1 | 4 | 3 | 3 |
| G0CXG1;embl-cds: AEG82301  | Uncharacterized Protein                                      | 1 | 1 | 1 |   | 1 | 1 |
| G0CXG7;embl-cds: AEG82307  | Succinyl-Coa:Coenzyme A Transferase                          | 3 | 1 | 2 | 6 | 3 | 3 |
| G0CXH8;embl-cds: AEG82318  | Upf0678 Fatty Acid-Binding Protein-Like Protein Culc22_01893 |   |   | 1 | 1 | 2 | 1 |
| G0CXI9;embl-cds: AEG82329  | Phosphoribosylformylglycinamide Synthase Subunit Purq        |   |   |   | 3 | 1 | 3 |
| G0CXJ0;embl-cds: AEG82330  | Phosphoribosylformylglycinamide Synthase Subunit Purs        | 1 | 1 | 2 | 4 | 2 | 2 |
| G0CXJ8;embl-cds: AEG82338  | Uncharacterized Protein                                      | 1 |   | 1 | 1 | 1 | 1 |
| G0C XK1;embl-cds: AEG82341 | Two-Component System Transcriptional Regulatory Protein      | 1 |   |   | 1 | 1 | 1 |
| G0C XK8;embl-cds: AEG81127 | Uncharacterized Protein                                      |   |   | 1 | 2 | 2 | 2 |
| G0CXM1;embl-cds: AEG81140  | Uncharacterized Protein                                      | 1 |   | 1 | 1 | 1 | 1 |

|                                  |                                                               |   |   |   |   |   |   |
|----------------------------------|---------------------------------------------------------------|---|---|---|---|---|---|
| G0CXN2;embl<br>-<br>cds:AEG81150 | Oxaloacetate Decarboxylase<br>Alpha Subunit                   |   |   |   | 4 | 1 | 2 |
| G0CXN3;embl<br>-<br>cds:AEG81151 | Methylmalonyl-Coa<br>Decarboxylase Alpha Subunit              | 1 |   |   | 5 | 4 | 4 |
| G0CXP3;embl<br>-<br>cds:AEG81161 | Cell Division Protein Ftsx                                    | 1 |   | 1 | 7 | 2 | 3 |
| G0CXQ2;embl<br>-<br>cds:AEG81170 | Uncharacterized Protein                                       |   |   |   | 2 | 2 | 2 |
| G0CXQ6;embl<br>-<br>cds:AEG81174 | Resuscitation-Promoting Factor                                | 4 | 2 | 3 | 4 | 3 | 4 |
| G0CXQ9;embl<br>-<br>cds:AEG81178 | Putative Secreted Protein                                     | 1 | 2 | 1 | 1 | 1 |   |
| G0CXR3;embl<br>-<br>cds:AEG81182 | Uncharacterized Protein                                       |   |   |   | 1 | 1 | 2 |
| G0CXR6;embl<br>-<br>cds:AEG81185 | Citrate Synthase                                              | 3 | 2 | 1 | 8 | 6 | 6 |
| G0CXR9;embl<br>-<br>cds:AEG81188 | Superoxide Dismutase [Cu-Zn]                                  | 1 | 3 |   | 1 | 2 | 2 |
| G0CX53;embl<br>-<br>cds:AEG81192 | Putative Transport Membrane<br>Protein                        |   |   | 1 | 3 | 2 | 1 |
| G0CY05;embl<br>-<br>cds:AEG82361 | Putative Transcription Factor                                 |   |   |   | 3 | 1 | 3 |
| G0CY06;embl<br>-<br>cds:AEG82362 | Putative Secreted Protein                                     | 1 | 1 | 3 | 2 | 3 | 2 |
| G0CY28;embl<br>-<br>cds:AEG81208 | Uncharacterized Protein                                       | 2 | 3 | 3 | 1 | 2 | 1 |
| G0CY30;embl<br>-<br>cds:AEG81210 | Uncharacterized Protein                                       |   | 1 | 2 | 4 | 1 | 2 |
| G0CY32;embl<br>-<br>cds:AEG81212 | Thymidylate Synthase                                          | 2 |   |   | 2 | 1 | 2 |
| G0CY53;embl<br>-<br>cds:AEG81233 | 30S Ribosomal Protein S18                                     | 1 | 1 |   | 1 | 1 | 1 |
| G0CY55;embl<br>-<br>cds:AEG81235 | 50S Ribosomal Protein L33                                     |   |   | 1 | 1 | 1 | 1 |
| G0CY56;embl<br>-<br>cds:AEG81236 | 50S Ribosomal Protein L28                                     | 3 | 1 | 2 | 4 | 3 | 3 |
| G0CY58;embl<br>-<br>cds:AEG81238 | 50S Ribosomal Protein L32                                     | 2 | 2 | 2 | 2 | 2 | 2 |
| G0CY59;embl<br>-<br>cds:AEG81239 | Two-Component System<br>Transcriptional Regulatory<br>Protein | 1 | 1 | 1 | 3 |   | 4 |
| G0CY64;embl<br>-<br>cds:AEG81244 | Large-Conductance<br>Mechanosensitive Channel                 |   |   |   | 2 | 2 | 1 |
| G0CY67;embl<br>-<br>cds:AEG81247 | Utp--Glucose-1-Phosphate<br>Uridyltransferase                 | 1 | 1 | 1 | 3 | 1 | 1 |
| G0CY87;embl<br>-<br>cds:AEG81267 | Uncharacterized Protein                                       |   |   |   | 3 | 1 | 1 |
| G0CY91;embl<br>-<br>cds:AEG81271 | Uncharacterized Protein                                       |   |   |   | 1 | 1 | 1 |
| G0CY97;embl<br>-<br>cds:AEG81276 | Peptide Chain Release Factor 3                                | 1 |   |   | 5 | 2 | 1 |

|                                   |                                            |    |    |    |    |    |    |
|-----------------------------------|--------------------------------------------|----|----|----|----|----|----|
| G0CYA4;embl<br>-<br>cgs: AEG81281 | 50S Ribosomal Protein L25                  | 1  | 1  | 1  | 5  | 1  | 1  |
| G0CYB4;embl-<br>cgs: AEG82383     | Choline Dehydrogenase                      |    |    |    | 4  | 2  | 3  |
| G0CYC3;embl<br>-<br>cgs: AEG82392 | Atp-Dependent Zinc<br>Metalloprotease Ftsh | 1  | 1  | 1  | 4  | 2  | 4  |
| G0CYC4;embl<br>-<br>cgs: AEG82393 | Hypoxanthine<br>Phosphoribosyltransferase  |    |    |    | 1  | 1  | 1  |
| G0CYH1;embl<br>-<br>cgs: AEG82442 | Purine<br>Phosphoribosyltransferase        | 3  | 4  | 4  | 4  | 4  | 4  |
| G0CYH2;embl<br>-<br>cgs: AEG82443 | Putative Membrane Protein                  | 11 | 10 | 12 | 10 | 13 | 12 |
| G0CYJ1;embl-<br>cgs: AEG81283     | Ribose-Phosphate<br>Pyrophosphokinase      |    |    |    | 3  | 1  | 2  |
| G0CYK0;embl<br>-<br>cgs: AEG81292 | Enolase                                    | 1  |    | 1  | 8  | 5  | 7  |
| G0CYK2;embl<br>-<br>cgs: AEG81294 | Uncharacterized Protein                    | 3  | 1  | 2  | 3  | 1  | 3  |
| G0CYK9;embl<br>-<br>cgs: AEG81301 | Transcription Elongation Factor<br>Grea    | 2  | 1  | 2  | 3  | 4  | 3  |
| G0CYM4;embl<br>-<br>cgs: AEG81317 | Fumarate Hydratase Class Ii                | 5  | 2  | 6  | 12 | 7  | 12 |
| G0CYP9;embl-<br>cgs: AEG81341     | Uncharacterized Protein                    |    |    |    | 11 | 5  | 5  |
| G0CYQ3;embl<br>-<br>cgs: AEG81345 | Putative Secreted Protein                  | 1  |    |    | 1  | 1  | 1  |
| G0CYQ5;embl<br>-<br>cgs: AEG81347 | Uncharacterized Protein                    | 2  | 1  | 2  | 1  | 1  |    |
| G0CYQ7;embl<br>-<br>cgs: AEG81349 | Uncharacterized Protein                    |    | 2  | 2  | 12 | 7  | 9  |
| G0CYS8;embl-<br>cgs: AEG82468     | Fructose-Bisphosphate Aldolase             | 1  | 1  | 2  | 6  | 1  | 2  |
| G0CYT3;embl-<br>cgs: AEG82473     | Thiosulfate Sulfurtransferase              |    |    |    | 2  | 1  | 4  |
| G0CYV5;embl<br>-<br>cgs: AEG82498 | Alcohol Dehydrogenase                      | 1  | 2  | 1  | 2  | 2  | 1  |
| G0CYV6;embl<br>-<br>cgs: AEG82499 | Aldehyde Dehydrogenase                     | 3  | 2  | 1  | 4  | 3  | 3  |
| G0CYW2;emb<br>l-<br>cgs: AEG82505 | Chaperone Protein Dnak                     | 6  | 3  | 5  | 21 | 10 | 13 |
| G0CYW6;emb<br>l-<br>cgs: AEG82509 | Putative Membrane Protein                  |    |    |    | 1  | 1  | 1  |

|                                   |                                                |   |   |   |    |    |    |
|-----------------------------------|------------------------------------------------|---|---|---|----|----|----|
| G0CYY1;embl<br>-<br>cds: AEG82523 | Urease Accessory Protein Ureg                  | 6 | 6 | 6 | 7  | 6  | 6  |
| G0CYY2;embl<br>-<br>cds: AEG82524 | Urease Accessory Protein Uref                  |   |   |   | 1  | 1  | 1  |
| G0CYY3;embl<br>-<br>cds: AEG82525 | Urease Accessory Protein Uree                  | 5 | 3 | 2 | 8  | 6  | 3  |
| G0CYY4;embl<br>-<br>cds: AEG82526 | Urease Subunit Alpha                           | 5 | 4 | 4 | 7  | 5  | 5  |
| G0CYY5;embl<br>-<br>cds: AEG82527 | Urease Subunit Beta                            | 4 | 2 | 3 | 6  | 3  | 3  |
| G0CZ22;embl<br>-<br>cds: AEG81380 | 2-Oxoglutarate Dehydrogenase<br>E1 Component   | 6 | 4 | 5 | 23 | 14 | 16 |
| G0CZ24;embl<br>-<br>cds: AEG81382 | Uncharacterized Protein                        |   |   |   | 1  | 1  | 1  |
| G0CZ35;embl<br>-<br>cds: AEG81393 | Atp-Dependent Rna Helicase<br>Dead             | 1 |   | 1 | 8  | 4  | 6  |
| G0CZ52;embl<br>-<br>cds: AEG81410 | Uncharacterized Protein                        | 5 | 2 | 6 | 13 | 10 | 12 |
| G0CZ53;embl<br>-<br>cds: AEG81411 | Uncharacterized Protein                        | 3 | 1 | 2 | 4  | 4  | 4  |
| G0CZ57;embl<br>-<br>cds: AEG81415 | Homoserine Dehydrogenase                       |   |   |   | 5  | 2  | 4  |
| G0CZ62;embl<br>-<br>cds: AEG81420 | Peptide Chain Release Factor 1                 | 2 |   |   | 2  | 4  | 4  |
| G0CZ70;embl<br>-<br>cds: AEG81428 | Atp Synthase Subunit Delta                     | 4 | 2 | 3 | 11 | 7  | 6  |
| G0CZ71;embl<br>-<br>cds: AEG81429 | Atp Synthase Subunit Alpha                     | 2 | 1 | 5 | 10 | 7  | 6  |
| G0CZ73;embl<br>-<br>cds: AEG81431 | Atp Synthase Subunit Beta                      | 3 | 3 | 6 | 15 | 10 | 12 |
| G0CZ86;embl<br>-<br>cds: AEG81444 | Electron Transfer Flavoprotein<br>Beta Subunit | 3 | 2 | 2 | 5  | 3  | 3  |
| G0CZ94;embl<br>-<br>cds: AEG82552 | Phosphoenolpyruvate<br>Carboxykinase [Gtp]     | 3 | 2 | 1 | 10 | 1  | 3  |
| G0CZA6;embl<br>-<br>cds: AEG82564 | Putative Secreted Protein                      | 2 | 1 | 2 | 2  | 2  | 1  |
| G0CZA9;embl<br>-<br>cds: AEG82567 | Trehalose Corynomycoly<br>Transferase          | 6 | 5 | 6 | 5  | 5  | 5  |
| G0CZB2;embl<br>-<br>cds: AEG82570 | Uncharacterized Protein                        |   |   |   | 2  | 1  | 1  |
| G0CZB9;embl<br>-<br>cds: AEG82576 | Udp-Galactopyranose Mutase                     | 1 | 1 | 1 |    | 1  | 3  |
| G0CZC6;embl<br>-<br>cds: AEG82583 | Serine--Trna Ligase                            | 6 | 2 | 5 | 7  | 7  | 7  |
| G0CZC8;embl<br>-<br>cds: AEG82585 | Putative Secreted Protein                      | 1 |   | 1 | 2  | 1  | 1  |
| G0CZF7;embl<br>-<br>cds: AEG82610 | Uncharacterized Protein                        | 1 | 1 | 1 | 4  | 2  | 1  |
| G0CZG8;embl<br>-<br>cds: AEG82621 | Uncharacterized Protein                        | 5 | 2 | 3 | 4  | 4  | 3  |



|                                    |                                                                   |   |   |    |    |    |    |
|------------------------------------|-------------------------------------------------------------------|---|---|----|----|----|----|
| G0CZH7;embl<br>-<br>cids: AEG81453 | Aspartyl/Glutamyl-<br>Trna(Asn/Gln)<br>Amidotransferase Subunit C | 3 | 1 | 1  | 4  | 3  | 4  |
| G0CZI7;embl<br>-<br>cids: AEG81463 | Aspartyl/Glutamyl-<br>Trna(Asn/Gln)<br>Amidotransferase Subunit B | 6 | 4 | 5  | 11 | 6  | 7  |
| G0CZP6;embl<br>-<br>cids: AEG81523 | 30S Ribosomal Protein S1                                          | 7 | 8 | 13 | 30 | 18 | 22 |
| G0CZQ1;embl<br>-<br>cids: AEG81528 | Uncharacterized Protein                                           | 2 | 1 | 2  | 3  | 2  | 2  |
| G0CZQ5;embl<br>-<br>cids: AEG82627 | Rod-Shaped Morphology<br>Protein                                  | 4 | 3 | 2  | 8  | 8  | 10 |
| G0CZQ7;embl<br>-<br>cids: AEG82629 | Uncharacterized Protein                                           | 1 | 1 |    | 2  | 1  | 1  |
| G0CZR3;embl<br>-<br>cids: AEG82636 | 50S Ribosomal Protein L9                                          | 3 | 3 | 4  | 6  | 4  | 5  |
| G0CZR5;embl<br>-<br>cids: AEG82638 | 30S Ribosomal Protein S6                                          |   |   | 2  | 2  | 1  | 1  |
| G0CZS0;embl<br>-<br>cids: AEG82643 | Marr-Family Transcription<br>Regulator                            | 2 |   | 1  | 3  | 2  | 2  |
| G0CZU4;embl<br>-<br>cids: AEG82666 | N-Acylglucosamine-6-<br>Phosphate 2-Epimerase                     |   |   |    | 5  | 1  | 3  |
| G0CZU9;embl<br>-<br>cids: AEG82671 | Putative Membrane Protein                                         |   |   |    | 5  | 2  | 2  |
| G0CTB4                             | Phenylalanine--Trna Ligase Beta<br>Subunit                        |   |   |    | 8  | 5  | 6  |
| G0CTC5                             | Uncharacterized Protein                                           |   |   |    | 2  | 2  | 4  |
| G0CTD0                             | Uncharacterized Protein                                           |   |   |    | 3  | 1  | 1  |
| G0CTD1                             | Putative Secreted Protein                                         |   |   |    | 10 | 8  | 10 |
| G0CTE1                             | Pseudouridine Synthase                                            |   |   |    | 1  | 1  | 2  |
| G0CTE6                             | Putative Membrane Protein                                         |   |   |    | 3  | 1  | 3  |
| G0CTE8                             | Iron Abc Transport System<br>Substrate-Binding Protein            |   |   |    | 1  | 1  | 3  |
| G0CTG2                             | Putative Secreted Protein                                         |   |   |    | 5  | 2  | 2  |
| G0CTH4                             | Nadh Dehydrogenase                                                |   |   |    | 5  | 6  | 6  |
| G0CTI0                             | Putative Secreted Protein                                         |   |   |    | 1  | 1  | 4  |
| G0CTI6                             | Cobaltochelataase                                                 |   |   |    | 2  | 2  | 2  |
| G0CTJ0                             | Chromosome Partitioning<br>Protein                                |   |   |    | 5  | 4  | 4  |
| G0CTJ8                             | Precorrin-8X Methylmutase                                         |   |   |    | 1  | 2  | 1  |
| G0CTL9                             | Formate--Tetrahydrofolate<br>Ligase                               |   |   |    | 4  | 4  | 2  |
| G0CTM0                             | Aspartate Ammonia-Lyase                                           |   |   |    | 7  | 4  | 5  |
| G0CTM1                             | Putative Membrane Protein                                         |   |   |    | 1  | 2  | 2  |
| G0CTN0                             | Putative Secreted Protein                                         |   |   |    | 8  | 6  | 6  |
| G0CTP7                             | Uncharacterized Protein                                           |   |   |    | 1  | 1  | 1  |
| G0CTQ1                             | Resuscitation-Promoting Factor<br>Interacting Protein             |   |   |    | 7  | 5  | 4  |
| G0CTQ3                             | Aconitase                                                         |   |   |    | 15 | 9  | 8  |

|        |                                                |  |  |  |    |   |    |
|--------|------------------------------------------------|--|--|--|----|---|----|
| G0CTR6 | Putative Phage Tail Fiber Protein              |  |  |  | 4  | 2 | 5  |
| G0CTW6 | Transketolase                                  |  |  |  | 11 | 8 | 11 |
| G0CTW7 | Transaldolase                                  |  |  |  | 9  | 6 | 5  |
| G0CTW8 | Glucose-6-Phosphate 1-Dehydrogenase            |  |  |  | 5  | 1 | 1  |
| G0CTW9 | Uncharacterized Protein                        |  |  |  | 4  | 1 | 2  |
| G0CTX0 | 6-Phosphogluconolactonase                      |  |  |  | 2  | 1 | 2  |
| G0CTX3 | Triosephosphate Isomerase                      |  |  |  | 6  | 7 | 6  |
| G0CTX4 | Phosphoglycerate Kinase                        |  |  |  | 14 | 9 | 10 |
| G0CTX5 | Glyceraldehyde-3-Phosphate Dehydrogenase       |  |  |  | 6  | 4 | 5  |
| G0CTY2 | Riboflavin Biosynthesis Protein Ribba          |  |  |  | 3  | 1 | 2  |
| G0CTY6 | Uncharacterized Protein                        |  |  |  | 3  | 2 | 1  |
| G0CTY7 | Methionyl-Trna Formyltransferase               |  |  |  | 2  | 1 | 1  |
| G0CTZ4 | Guanylate Kinase                               |  |  |  | 5  | 1 | 4  |
| G0CTZ6 | Orotidine 5'-Phosphate Decarboxylase           |  |  |  | 1  | 1 | 1  |
| G0CTZ7 | Carbamoyl-Phosphate Synthase Large Chain       |  |  |  | 12 | 8 | 6  |
| G0CTZ8 | Carbamoyl-Phosphate Synthase Small Chain       |  |  |  | 3  | 2 | 1  |
| G0CU01 | Bifunctional Protein Pyrr                      |  |  |  | 2  | 1 | 3  |
| G0CU05 | N Utilization Substance Protein B Homolog      |  |  |  | 1  | 3 | 2  |
| G0CU16 | Dna Polymerase Iii Subunit Beta                |  |  |  | 2  | 3 | 3  |
| G0CU26 | Alanine--Trna Ligase                           |  |  |  | 5  | 2 | 5  |
| G0CU29 | Aspartyl-Trna Synthetase                       |  |  |  | 6  | 3 | 4  |
| G0CU32 | Putative Membrane Protein                      |  |  |  | 5  | 2 | 5  |
| G0CU36 | L-Serine Dehydratase                           |  |  |  | 5  | 2 | 3  |
| G0CU37 | Histidine--Trna Ligase                         |  |  |  | 8  | 4 | 4  |
| G0CU39 | Probable Thiol Peroxidase                      |  |  |  | 2  | 2 | 3  |
| G0CU40 | Peptidyl-Prolyl Cis-Trans Isomerase            |  |  |  | 5  | 1 | 1  |
| G0CU41 | Putative Secreted Protein                      |  |  |  | 4  | 2 | 2  |
| G0CU46 | Protein Translocase Subunit Secd               |  |  |  | 5  | 2 | 1  |
| G0CU63 | Putative Secreted Protein                      |  |  |  | 5  | 3 | 3  |
| G0CU69 | Uncharacterized Protein                        |  |  |  | 2  | 3 | 3  |
| G0CU81 | Rna Polymerase Sigma Factor Siga               |  |  |  | 6  | 6 | 9  |
| G0CU83 | Uncharacterized Protein                        |  |  |  | 1  | 2 | 2  |
| G0CU88 | Rna Polymerase Sigma Factor                    |  |  |  | 3  | 3 | 4  |
| G0CU90 | Udp-Glucose 4-Epimerase                        |  |  |  | 4  | 2 | 2  |
| G0CUA8 | Uncharacterized Protein                        |  |  |  | 6  | 5 | 4  |
| G0CUA9 | Peptidyl-Prolyl Cis-Trans Isomerase            |  |  |  | 7  | 3 | 4  |
| G0CUD3 | Iron-Siderophore Binding Protein               |  |  |  | 3  | 6 | 8  |
| G0CUH4 | Uncharacterized Protein                        |  |  |  | 1  | 2 | 2  |
| G0CUI2 | Putative Secreted Protein                      |  |  |  | 5  | 5 | 5  |
| G0CUI4 | Phosphoenolpyruvate-Protein Phosphotransferase |  |  |  | 8  | 5 | 5  |

|        |                                                          |  |  |  |    |    |    |
|--------|----------------------------------------------------------|--|--|--|----|----|----|
| G0CUJ9 | Uncharacterized Protein                                  |  |  |  | 10 | 4  | 6  |
| G0CUK2 | Trna-2-Methylthio-N(6)-Dimethylallyl-adenosine Synthase  |  |  |  | 1  | 2  | 1  |
| G0CUL5 | Cell Division Protein                                    |  |  |  | 1  | 2  | 1  |
| G0CUL7 | Uncharacterized Protein                                  |  |  |  | 2  | 6  | 7  |
| G0CUN5 | Putative Secreted Protein                                |  |  |  | 4  | 3  | 4  |
| G0CUN6 | Proline--Trna Ligase                                     |  |  |  | 5  | 3  | 3  |
| G0CUP5 | Uncharacterized Protein                                  |  |  |  | 3  | 1  | 2  |
| G0CUP6 | Probable Malate:Quinone Oxidoreductase                   |  |  |  | 9  | 2  | 4  |
| G0CUQ3 | Penicillin-Binding Protein                               |  |  |  | 7  | 7  | 7  |
| G0CUR9 | 1,4-Alpha-Glucan-Branching Enzyme                        |  |  |  | 1  | 1  | 5  |
| G0CUS0 | Putative Secreted Protein                                |  |  |  | 8  | 6  | 7  |
| G0CUT4 | Crispr-Associated Protein                                |  |  |  | 4  | 3  | 2  |
| G0CUT7 | Uncharacterized Protein                                  |  |  |  | 3  | 3  | 3  |
| G0CUU0 | Uncharacterized Iron-Regulated Membrane Protein          |  |  |  | 7  | 7  | 5  |
| G0CUU1 | Uncharacterized Protein                                  |  |  |  | 2  | 1  | 1  |
| G0CUW2 | Glycerol Kinase                                          |  |  |  | 6  | 1  | 2  |
| G0CUW6 | Uncharacterized Protein                                  |  |  |  | 1  | 1  | 1  |
| G0CUW9 | Arabinosyl Transferase                                   |  |  |  | 4  | 3  | 5  |
| G0CUX2 | Decaprenylphosphoryl-Beta-D-Ribose 2-Epimerase Component |  |  |  | 10 | 4  | 7  |
| G0CUY8 | Putative Phenylalanine Aminotransferase                  |  |  |  | 2  | 1  | 1  |
| G0CUZ3 | Uncharacterized Protein                                  |  |  |  | 4  | 5  | 4  |
| G0CUZ9 | Putative Secreted Protein                                |  |  |  | 3  | 3  | 3  |
| G0CV13 | Uncharacterized Protein                                  |  |  |  | 8  | 4  | 2  |
| G0CV19 | 30S Ribosomal Protein S16                                |  |  |  | 6  | 3  | 3  |
| G0CV20 | Signal Recognition Particle Protein                      |  |  |  | 8  | 5  | 7  |
| G0CV23 | Signal Recognition Particle Receptor Ftsy                |  |  |  | 3  | 3  | 4  |
| G0CV32 | Uncharacterized Protein                                  |  |  |  | 1  | 1  | 1  |
| G0CV35 | Uncharacterized Protein                                  |  |  |  | 1  | 1  | 1  |
| G0CV40 | Alpha-1,4 Glucan Phosphorylase                           |  |  |  | 4  | 5  | 5  |
| G0CV42 | Pyruvate Kinase                                          |  |  |  | 8  | 6  | 6  |
| G0CV45 | Putative Membrane Protein                                |  |  |  | 1  | 1  | 1  |
| G0CV60 | Glycogen Operon Protein Glgx Homolog                     |  |  |  | 1  | 1  | 1  |
| G0CV77 | Isoleucine--Trna Ligase                                  |  |  |  | 15 | 7  | 13 |
| G0CV91 | Drug Exporter Of The Rnd Superfamily                     |  |  |  | 2  | 1  | 1  |
| G0CVA4 | Uncharacterized Protein                                  |  |  |  | 1  | 2  | 3  |
| G0CVA5 | Uncharacterized Protein                                  |  |  |  | 3  | 2  | 3  |
| G0CVC1 | Putative Secreted Lpxtg Protein                          |  |  |  | 5  | 5  | 4  |
| G0CVC2 | Putative Secreted Protein                                |  |  |  | 6  | 6  | 6  |
| G0CVD2 | Uncharacterized Protein                                  |  |  |  | 1  | 4  | 7  |
| G0CVD4 | Laminin Subunit Beta-2                                   |  |  |  | 8  | 7  | 8  |
| G0CVF2 | Putative Secreted Protein                                |  |  |  | 4  | 5  | 3  |
| G0CVF4 | Putative Secreted Protein                                |  |  |  | 5  | 10 | 12 |

|        |                                                                                                                     |  |  |  |    |   |   |
|--------|---------------------------------------------------------------------------------------------------------------------|--|--|--|----|---|---|
| G0CVG7 | Cell Division Protein                                                                                               |  |  |  | 1  | 1 | 1 |
| G0CVG8 | Udp-N-Acetylmuramate--L-Alanine Ligase                                                                              |  |  |  | 5  | 3 | 4 |
| G0CVG9 | Udp-N-Acetylglucosamine--N-Acetylmuramyl-(Pentapeptide) Pyrophosphoryl-Undecaprenol N-Acetylglucosamine Transferase |  |  |  | 1  | 2 | 3 |
| G0CVH4 | Udp-N-Acetylmuramyl-Tripeptide Synthetase                                                                           |  |  |  | 6  | 2 | 4 |
| G0CVH5 | Penicillin-Binding Protein                                                                                          |  |  |  | 11 | 8 | 9 |
| G0CVH6 | Uncharacterized Protein                                                                                             |  |  |  | 1  | 1 | 1 |
| G0CVI4 | Geranylgeranyl Pyrophosphate Synthase                                                                               |  |  |  | 7  | 3 | 3 |
| G0CVI7 | Serine/Threonine Protein Kinase                                                                                     |  |  |  | 4  | 1 | 1 |
| G0CVI8 | Phospho-2-Dehydro-3-Deoxyheptonate Aldolase                                                                         |  |  |  | 4  | 3 | 6 |
| G0CVJ4 | Cell Wall-Associated Hydrolase                                                                                      |  |  |  | 3  | 3 | 2 |
| G0CVK2 | Asparagine Synthetase                                                                                               |  |  |  | 10 | 2 | 7 |
| G0CVK4 | Uncharacterized Protein                                                                                             |  |  |  | 3  | 1 | 1 |
| G0CVK9 | Probable Cytosol Aminopeptidase                                                                                     |  |  |  | 8  | 1 | 1 |
| G0CVL1 | Dihydrolipoamide Acyltransferase                                                                                    |  |  |  | 16 | 5 | 5 |
| G0CVL2 | Glycine Dehydrogenase (Decarboxylating)                                                                             |  |  |  | 4  | 1 | 1 |
| G0CVL3 | Aminomethyltransferase                                                                                              |  |  |  | 5  | 5 | 4 |
| G0CVL4 | Glycine Cleavage System H Protein                                                                                   |  |  |  | 2  | 1 | 1 |
| G0CVM5 | Glutamine Synthetase                                                                                                |  |  |  | 1  | 1 | 2 |
| G0CVN4 | Threonine Synthase                                                                                                  |  |  |  | 6  | 6 | 2 |
| G0CVN8 | Heme Oxygenase                                                                                                      |  |  |  | 1  | 3 | 2 |
| G0CVP2 | Uncharacterized Protein                                                                                             |  |  |  | 5  | 1 | 2 |
| G0CVR3 | Dna Topoisomerase 1                                                                                                 |  |  |  | 9  | 1 | 4 |
| G0CVS7 | Putative Secreted Protein                                                                                           |  |  |  | 11 | 7 | 9 |
| G0CVU6 | Uncharacterized Protein                                                                                             |  |  |  | 15 | 9 | 4 |
| G0CVV7 | Putative Secreted Protein                                                                                           |  |  |  | 6  | 5 | 5 |
| G0CVX2 | Uncharacterized Protein                                                                                             |  |  |  | 5  | 4 | 2 |
| G0CVZ0 | Pyruvate Dehydrogenase E1 Component                                                                                 |  |  |  | 19 | 6 | 7 |
| G0CW01 | Putative Secreted Protein                                                                                           |  |  |  | 2  | 1 | 1 |
| G0CW05 | Putative Secreted Lpxtg Protein                                                                                     |  |  |  | 3  | 1 | 1 |
| G0CW08 | Glycine--Trna Ligase                                                                                                |  |  |  | 7  | 4 | 5 |
| G0CW14 | Gtpase Era                                                                                                          |  |  |  | 2  | 1 | 5 |
| G0CW15 | Pyridoxamine Kinase                                                                                                 |  |  |  | 2  | 1 | 1 |
| G0CW20 | Chaperone Protein Dnaj                                                                                              |  |  |  | 3  | 3 | 4 |
| G0CW28 | Peptidyl-Dipeptidase                                                                                                |  |  |  | 4  | 2 | 1 |
| G0CW33 | Putative Secreted Protein                                                                                           |  |  |  | 3  | 2 | 2 |
| G0CW41 | Putative Secreted Protein                                                                                           |  |  |  | 2  | 7 | 8 |
| G0CW72 | 2-Succinyl-5-Enolpyruvyl-6-Hydroxy-3-Cyclohexene-1-Carboxylate Synthase                                             |  |  |  | 1  | 1 | 1 |
| G0CW75 | Demethylmenaquinone Methyltransferase                                                                               |  |  |  | 1  | 1 | 2 |

|        |                                                        |  |  |  |    |    |    |
|--------|--------------------------------------------------------|--|--|--|----|----|----|
| G0CW80 | Transcription Termination/Antitermination Protein Nusg |  |  |  | 4  | 2  | 1  |
| G0CW83 | Bleomycin Hydrolase                                    |  |  |  | 2  | 1  | 1  |
| G0CW85 | Uncharacterized Protein                                |  |  |  | 1  | 1  | 1  |
| G0CW93 | Putative Secreted Protein                              |  |  |  | 5  | 1  | 1  |
| G0CW94 | Putative Secreted Protein                              |  |  |  | 3  | 7  | 3  |
| G0CW96 | Dna-Directed Rna Polymerase                            |  |  |  | 23 | 14 | 13 |
| G0CW98 | Putative Secreted Lpxtg Protein                        |  |  |  | 4  | 3  | 3  |
| G0CWD5 | Uncharacterized Protein                                |  |  |  | 1  | 1  | 3  |
| G0CWE4 | Non-Specific Acid Phosphatase                          |  |  |  | 9  | 5  | 5  |
| G0CWE6 | 50S Ribosomal Protein L6                               |  |  |  | 6  | 3  | 4  |
| G0CWF3 | Uncharacterized Protein                                |  |  |  | 1  | 1  | 1  |
| G0CWH0 | Putative Secreted Protein                              |  |  |  | 4  | 3  | 2  |
| G0CWH1 | Uncharacterized Protein                                |  |  |  | 3  | 1  | 1  |
| G0CWJ2 | Uncharacterized Protein                                |  |  |  | 1  | 1  | 1  |
| G0CWK1 | Uncharacterized Protein                                |  |  |  | 1  | 2  | 1  |
| G0CWK7 | Ribosomal Silencing Factor Rsfs                        |  |  |  | 1  | 2  | 2  |
| G0CWL7 | Ribonuclease E                                         |  |  |  | 10 | 5  | 14 |
| G0CWM2 | Dihydrofolate Synthase / Folylpolyglutamate Synthase   |  |  |  | 5  | 3  | 1  |
| G0CWM3 | Valine--Trna Ligase                                    |  |  |  | 13 | 4  | 6  |
| G0CWN1 | Trigger Factor                                         |  |  |  | 9  | 6  | 7  |
| G0CWP1 | Uncharacterized Protein                                |  |  |  | 4  | 2  | 1  |
| G0CWP3 | Adenylate Kinase                                       |  |  |  | 6  | 5  | 6  |
| G0CWP5 | Sialidase                                              |  |  |  | 20 | 14 | 17 |
| G0CWP6 | Putative Secreted Protein                              |  |  |  | 4  | 2  | 3  |
| G0CWS8 | 60 Kda Chaperonin                                      |  |  |  | 18 | 12 | 11 |
| G0CWT4 | Inosine-5'-Monophosphate Dehydrogenase                 |  |  |  | 4  | 3  | 3  |
| G0CWT8 | Gmp Synthase [Glutamine-Hydrolyzing]                   |  |  |  | 11 | 4  | 6  |
| G0CWU7 | Putative Secreted Protein                              |  |  |  | 1  | 1  | 1  |
| G0CWV2 | Manganese Abc Transporter, Atp-Binding Protein         |  |  |  | 1  | 1  | 1  |
| G0CWX8 | Uncharacterized Protein                                |  |  |  | 13 | 7  | 5  |
| G0CWZ3 | Putative Secreted Protein                              |  |  |  | 5  | 1  | 4  |
| G0CWZ4 | Putative Secreted Protein                              |  |  |  | 5  | 4  | 4  |
| G0CWZ6 | Corynebacterineae Mycolate Reductase A                 |  |  |  | 2  | 2  | 1  |
| G0CX25 | Fatty Acid Synthase                                    |  |  |  | 47 | 25 | 30 |
| G0CX30 | Uncharacterized Protein                                |  |  |  | 10 | 5  | 5  |
| G0CX36 | Ribonuclease Ph                                        |  |  |  | 2  | 2  | 1  |
| G0CX49 | Isocitrate Dehydrogenase                               |  |  |  | 17 | 13 | 17 |
| G0CX54 | Venom Serine Protease Kn13                             |  |  |  | 1  | 1  | 1  |
| G0CX59 | Uncharacterized Protein                                |  |  |  | 6  | 3  | 4  |
| G0CX68 | Pyruvate Carboxylase                                   |  |  |  | 26 | 12 | 11 |
| G0CX70 | Uncharacterized Protein                                |  |  |  | 1  | 1  | 1  |
| G0CX71 | Acyl-Coa Carboxylase Alpha Subunit                     |  |  |  | 19 | 12 | 11 |
| G0CX73 | Uncharacterized Protein                                |  |  |  | 7  | 4  | 5  |
| G0CX77 | Ribokinase                                             |  |  |  | 1  | 2  | 2  |

|        |                                                            |  |  |  |    |    |    |
|--------|------------------------------------------------------------|--|--|--|----|----|----|
| G0CX80 | Acyl-Coa Carboxylase Complex Subunit                       |  |  |  | 6  | 8  | 4  |
| G0CX95 | Putative Secreted Protein                                  |  |  |  | 7  | 12 | 10 |
| G0CX98 | Putative Glycosyltransferase                               |  |  |  | 2  | 2  | 1  |
| G0CXA3 | Phosphomannomutase                                         |  |  |  | 5  | 4  | 4  |
| G0CXA8 | Adenosylhomocysteinase                                     |  |  |  | 2  | 1  | 1  |
| G0CXB2 | Lipoprotein Lpqb                                           |  |  |  | 4  | 3  | 3  |
| G0CXB4 | Uncharacterized Protein                                    |  |  |  | 5  | 3  | 3  |
| G0CXB5 | Protein Translocase Subunit Seca                           |  |  |  | 15 | 10 | 14 |
| G0CXC0 | Uncharacterized Protein                                    |  |  |  | 6  | 5  | 5  |
| G0CXD0 | Putative Secreted Protein                                  |  |  |  | 1  | 3  | 3  |
| G0CXE4 | Uncharacterized Protein                                    |  |  |  | 4  | 3  | 3  |
| G0CXE5 | Putative Secreted Protein                                  |  |  |  | 8  | 3  | 3  |
| G0CXE8 | Putative Secreted Protein                                  |  |  |  | 1  | 1  | 2  |
| G0CXF4 | Uncharacterized Protein                                    |  |  |  | 1  | 1  | 1  |
| G0CXF9 | Cysteine Synthase                                          |  |  |  | 10 | 4  | 3  |
| G0CXG8 | Trna-Dihydrouridine Synthase                               |  |  |  | 2  | 1  | 1  |
| G0CXI2 | Phosphoribosylformylglycinamide Cyclo-Ligase               |  |  |  | 1  | 1  | 2  |
| G0CXI8 | Phosphoribosylformylglycinamide Synthase Subunit Purl      |  |  |  | 3  | 4  | 4  |
| G0CXJ4 | Adenylosuccinate Lyase                                     |  |  |  | 7  | 4  | 4  |
| G0CXJ7 | Phosphoribosylamine--Glycine Ligase                        |  |  |  | 6  | 7  | 6  |
| G0CXK4 | Putative Secreted Protein                                  |  |  |  | 10 | 10 | 9  |
| G0CXL8 | Uncharacterized Protein                                    |  |  |  | 5  | 4  | 5  |
| G0CXL9 | Putative Secreted Protein                                  |  |  |  | 1  | 2  | 2  |
| G0CXM2 | Upf0182 Protein Culc22_00609                               |  |  |  | 9  | 10 | 7  |
| G0CXN6 | Putative Secreted Protein                                  |  |  |  | 5  | 5  | 4  |
| G0CXN9 | Peptide Chain Release Factor 2                             |  |  |  | 4  | 2  | 3  |
| G0CXP7 | Putative Iron Abc Transport System, Solute-Binding Protein |  |  |  | 11 | 6  | 5  |
| G0CXR4 | Uncharacterized Protein                                    |  |  |  | 1  | 2  | 3  |
| G0CXS5 | Putative Secreted Protein                                  |  |  |  | 1  | 1  | 1  |
| G0CXU0 | Putative Secreted Lpxtg Protein                            |  |  |  | 3  | 1  | 1  |
| G0CXU1 | Uncharacterized Protein                                    |  |  |  | 3  | 3  | 3  |
| G0CXU9 | Putative Adhesin                                           |  |  |  | 7  | 6  | 7  |
| G0CXY6 | Uncharacterized Protein                                    |  |  |  | 4  | 1  | 1  |
| G0CXZ7 | Uncharacterized Protein                                    |  |  |  | 1  | 1  | 1  |
| G0CY02 | Cysteine--Trna Ligase                                      |  |  |  | 4  | 1  | 1  |
| G0CY07 | Putative Secreted Protein                                  |  |  |  | 2  | 2  | 1  |
| G0CY14 | Atp-Dependent Clp Protease Atp-Binding Subunit             |  |  |  | 13 | 5  | 5  |
| G0CY18 | Uncharacterized Protein                                    |  |  |  | 1  | 1  | 1  |
| G0CY21 | Laminin Subunit Beta-4                                     |  |  |  | 13 | 12 | 12 |
| G0CY38 | Glucose-6-Phosphate Isomerase                              |  |  |  | 3  | 3  | 2  |
| G0CY45 | Bifunctional Purine Biosynthesis Protein Purh              |  |  |  | 9  | 3  | 3  |
| G0CY47 | Glutamate Abc Transport System Substrate-Binding Protein   |  |  |  | 3  | 4  | 3  |
| G0CY52 | Uncharacterized Protein                                    |  |  |  | 1  | 1  | 2  |

|        |                                                                    |  |  |  |    |    |    |
|--------|--------------------------------------------------------------------|--|--|--|----|----|----|
| G0CY61 | Trypsin-Like Serine Protease                                       |  |  |  | 12 | 4  | 7  |
| G0CY77 | Methionine--Trna Ligase                                            |  |  |  | 1  | 2  | 4  |
| G0CY79 | Resuscitation-Promoting Factor                                     |  |  |  | 3  | 1  | 1  |
| G0CY90 | Uncharacterized Protein                                            |  |  |  | 1  | 2  | 1  |
| G0CY93 | Glyceraldehyde-3-Phosphate Dehydrogenase                           |  |  |  | 11 | 6  | 8  |
| G0CY98 | Uncharacterized Protein                                            |  |  |  | 1  | 2  | 1  |
| G0CYA8 | Lysine--Trna Ligase                                                |  |  |  | 6  | 9  | 7  |
| G0CYB2 | Betaine Aldehyde Dehydrogenase                                     |  |  |  | 1  | 2  | 2  |
| G0CYB7 | Uncharacterized Protein                                            |  |  |  | 1  | 1  | 2  |
| G0CYC6 | D-Alanyl-D-Alanine Carboxypeptidase                                |  |  |  | 7  | 6  | 6  |
| G0CYC8 | Uncharacterized Protein                                            |  |  |  | 2  | 1  | 2  |
| G0CYD0 | Putative Secreted Protein                                          |  |  |  | 2  | 4  | 1  |
| G0CYD3 | Uncharacterized Protein                                            |  |  |  | 5  | 3  | 3  |
| G0CYD5 | Uncharacterized Protein                                            |  |  |  | 5  | 3  | 3  |
| G0CYD6 | Uncharacterized Protein                                            |  |  |  | 4  | 1  | 2  |
| G0CYD7 | Uncharacterized Protein                                            |  |  |  | 1  | 1  | 1  |
| G0CYD8 | Uncharacterized Protein                                            |  |  |  | 9  | 5  | 6  |
| G0CYE0 | 60 Kda Chaperonin                                                  |  |  |  | 16 | 12 | 9  |
| G0CYE1 | Uncharacterized Protein                                            |  |  |  | 4  | 1  | 1  |
| G0CYF3 | Putative Secreted Protein                                          |  |  |  | 2  | 1  | 1  |
| G0CYG5 | Acetate Kinase                                                     |  |  |  | 12 | 6  | 5  |
| G0CYG6 | Phosphate Acetyltransferase                                        |  |  |  | 10 | 5  | 6  |
| G0CYG7 | Ferredoxin/Ferredoxin-Nadp Reductase                               |  |  |  | 14 | 12 | 8  |
| G0CYH6 | Uncharacterized Protein                                            |  |  |  | 1  | 1  | 1  |
| G0CYH7 | Uncharacterized Protein                                            |  |  |  | 5  | 2  | 4  |
| G0CYH8 | Uncharacterized Protein                                            |  |  |  | 4  | 3  | 4  |
| G0CYI9 | Putative Secreted Protein                                          |  |  |  | 8  | 8  | 9  |
| G0CYJ2 | Bifunctional Protein Glmu                                          |  |  |  | 12 | 4  | 6  |
| G0CYL6 | Serine Hydroxymethyltransferase                                    |  |  |  | 7  | 2  | 3  |
| G0CYM0 | Putative Secreted Protein                                          |  |  |  | 4  | 1  | 2  |
| G0CYM5 | Fructose-1,6-Bisphosphatase                                        |  |  |  | 5  | 3  | 2  |
| G0CYM9 | 4-Hydroxy-3-Methylbut-2-Enyl Diphosphate Reductase                 |  |  |  | 2  | 2  | 2  |
| G0CYN1 | Putative Membrane Protein                                          |  |  |  | 1  | 1  | 1  |
| G0CYN2 | Ribosome-Binding Atpase Ychf                                       |  |  |  | 7  | 4  | 4  |
| G0CYP6 | Putative Secreted Protein                                          |  |  |  | 4  | 8  | 8  |
| G0CYQ2 | Macrolide Export Atp-Binding/Permease Protein                      |  |  |  | 3  | 2  | 3  |
| G0CYQ4 | Uncharacterized Protein                                            |  |  |  | 2  | 2  | 1  |
| G0CYQ6 | Putative Secreted Protein                                          |  |  |  | 6  | 3  | 3  |
| G0CYQ8 | Uncharacterized Protein                                            |  |  |  | 1  | 1  | 2  |
| G0CYR6 | 2,3,4,5-Tetrahydropyridine-2,6-Dicarboxylate N-Succinyltransferase |  |  |  | 4  | 3  | 3  |
| G0CYS6 | Putative Secreted Lpxtg Protein                                    |  |  |  | 19 | 13 | 12 |
| G0CYS7 | Putative Secreted Protein                                          |  |  |  | 67 | 37 | 38 |
| G0CYT4 | Glycerol-3-Phosphate Dehydrogenase                                 |  |  |  | 7  | 9  | 9  |

|        |                                                    |  |  |  |    |    |    |
|--------|----------------------------------------------------|--|--|--|----|----|----|
| G0CYU2 | Uncharacterized Protein                            |  |  |  | 3  | 1  | 1  |
| G0CYU4 | Laminin Subunit Alpha-2                            |  |  |  | 2  | 5  | 6  |
| G0CYU5 | Putative Secreted Protein                          |  |  |  | 6  | 4  | 4  |
| G0CYU9 | Uncharacterized Protein                            |  |  |  | 3  | 1  | 2  |
| G0CYV0 | Putative Membrane Protein                          |  |  |  | 6  | 2  | 3  |
| G0CYV2 | Uncharacterized Protein                            |  |  |  | 20 | 11 | 12 |
| G0CYW1 | Protein Grpe                                       |  |  |  | 4  | 4  | 1  |
| G0CYW3 | Surface-Anchored Protein,<br>Fimbrial Subunit      |  |  |  | 6  | 5  | 4  |
| G0CYX8 | Abc Transport System,<br>Substrate-Binding Protein |  |  |  | 9  | 4  | 4  |
| G0CYY7 | Putative Membrane Protein                          |  |  |  | 2  | 1  | 1  |
| G0CYY8 | Aspartate Aminotransferase                         |  |  |  | 3  | 1  | 2  |
| G0CYZ0 | Lysyl-Trna Synthetase                              |  |  |  | 4  | 2  | 3  |
| G0CZ02 | Uncharacterized Protein                            |  |  |  | 17 | 11 | 9  |
| G0CZ04 | Arabinofuranosyl Transferase D                     |  |  |  | 1  | 2  | 3  |
| G0CZ09 | Ribosomal Rna<br>Methyltransferase                 |  |  |  | 7  | 4  | 4  |
| G0CZ10 | Uncharacterized Protein                            |  |  |  | 2  | 1  | 2  |
| G0CZ21 | Putative Secreted Protein                          |  |  |  | 1  | 2  | 3  |
| G0CZ34 | Galactokinase                                      |  |  |  | 1  | 3  | 2  |
| G0CZ55 | Arginine--Trna Ligase                              |  |  |  | 12 | 5  | 10 |
| G0CZ61 | Transcription Termination<br>Factor Rho            |  |  |  | 13 | 11 | 9  |
| G0CZ64 | Uncharacterized Protein                            |  |  |  | 1  | 1  | 1  |
| G0CZ69 | Atp Synthase Subunit B                             |  |  |  | 6  | 6  | 6  |
| G0CZ72 | Atp Synthase Gamma Chain                           |  |  |  | 2  | 3  | 4  |
| G0CZ79 | Uncharacterized Protein                            |  |  |  | 3  | 3  | 2  |
| G0CZ80 | Uncharacterized Protein                            |  |  |  | 1  | 1  | 1  |
| G0CZ87 | Electron Transfer Flavoprotein<br>Alpha Subunit    |  |  |  | 2  | 3  | 2  |
| G0CZA3 | Polyketide Synthase                                |  |  |  | 12 | 5  | 7  |
| G0CZA4 | Acyl-Coa Synthetase                                |  |  |  | 15 | 14 | 16 |
| G0CZA5 | Envelope Lipids Regulation<br>Factor               |  |  |  | 4  | 3  | 2  |
| G0CZA7 | Trehalose Corynomycolyl<br>Transferase             |  |  |  | 22 | 7  | 6  |
| G0CZB3 | Glycosyltransferase                                |  |  |  | 7  | 3  | 2  |
| G0CZB7 | Glycerophosphoryl Diester<br>Phosphodiesterase     |  |  |  | 5  | 11 | 13 |
| G0CZC3 | Putative Secreted Protein                          |  |  |  | 10 | 10 | 10 |
| G0CZD6 | Cell-Surface Hemin Receptor                        |  |  |  | 6  | 5  | 2  |
| G0CZD9 | Uncharacterized Protein                            |  |  |  | 3  | 2  | 4  |
| G0CZE3 | Thymidine Phosphorylase                            |  |  |  | 1  | 2  | 2  |
| G0CZE8 | Superoxide Dismutase                               |  |  |  | 1  | 1  | 2  |
| G0CZE9 | Uncharacterized Protein                            |  |  |  | 1  | 1  | 1  |
| G0CZG3 | Housekeeping Sortase                               |  |  |  | 5  | 3  | 2  |
| G0CZH8 | Glutamyl-Trna(Gln)<br>Amidotransferase Subunit A   |  |  |  | 11 | 3  | 5  |
| G0CZJ9 | Ketol-Acid Reductoisomerase                        |  |  |  | 5  | 4  | 3  |
| G0CZK0 | Putative Membrane-Anchored<br>Protein              |  |  |  | 6  | 3  | 2  |



|        |                                          |  |  |  |    |   |    |
|--------|------------------------------------------|--|--|--|----|---|----|
| G0CZK4 | D-3-Phosphoglycerate Dehydrogenase       |  |  |  | 6  | 5 | 7  |
| G0CZL2 | Glutamate--Trna Ligase                   |  |  |  | 9  | 7 | 5  |
| G0CZL4 | Putative Secreted Protein                |  |  |  | 14 | 8 | 10 |
| G0CZM9 | D-Alanine--D-Alanine Ligase              |  |  |  | 4  | 3 | 3  |
| G0CZP4 | Dna Polymerase                           |  |  |  | 2  | 1 | 2  |
| G0CZP7 | Pts System Glucose-Specific Component Ii |  |  |  | 4  | 2 | 1  |
| G0CZQ3 | Uncharacterized Protein                  |  |  |  | 4  | 4 | 2  |
| G0CZQ9 | Putative Secreted Protein                |  |  |  | 4  | 1 | 1  |
| G0CZR8 | Penicillin-Binding Protein               |  |  |  | 15 | 9 | 12 |
| G0CZS4 | Upf0176 Protein Culc22_02279             |  |  |  | 2  | 1 | 1  |
| G0CZS6 | Cell-Surface Hemin Receptor              |  |  |  | 4  | 3 | 4  |
| G0CZT1 | Putative Membrane Protein                |  |  |  | 12 | 8 | 8  |
| G0CZT2 | Leucine--Trna Ligase                     |  |  |  | 13 | 2 | 9  |
| G0CZU2 | Glucosamine-6-Phosphate Deaminase        |  |  |  | 4  | 1 | 2  |
| G0CZV7 | Uncharacterized Protein                  |  |  |  | 3  | 4 | 3  |
| G0CZY6 | Putative Secreted Protein                |  |  |  | 10 | 1 | 2  |
| G0CZY7 | Putative Membrane Protein                |  |  |  | 3  | 2 | 4  |
